# Supplementary material
Source: publisher figshare collection journal article supplement (https://diabetesjournals.figshare.com/articles/dataset/_/13342229)
Supplement: Supplementary file 1 [file 1]

## Sheet: Proteomics
Protein description	Uniprot ID	CTR#1	CTR#2	T2D+AAV-ctr #1	T2D+AAV-ctr #2	T2D+AAV-dnMCUb#1	T2D+AAV-dnMCUb#2	T2D+AAV-ctr vs. CTR Log2 Fold Change	T2D+AAV-ctr vs. CTR-ctr p-value	T2D+AAV-ctr vs. T2D+AAV-dnMCUb Log2 Fold Change	T2D+AAV-ctr vs. T2D+AAV-dnMCUb p-value
Histone H1.0 (Histone H1') (Histone H1(0)) (MyD196) [Cleaved into: Histone H1.0, N-terminally processed]	P10922	14100000	14100000	29200000	26100000	25800000	29400000	0.971584	0.012834	-0.00261121	0.985118
eIF-2-alpha kinase activator GCN1 (GCN1 eIF-2-alpha kinase activator homolog) (GCN1-like protein 1) (General control of amino-acid synthesis 1-like protein 1) (Translational activator GCN1)	E9PVA8	14100000	11900000	5810000	5860000	2910000	9650000	-1.15571	0.0227791	0.106032	0.907035
Structural maintenance of chromosomes protein 6 (SMC protein 6) (SMC-6) (mSMC6)	Q924W5	219000000	195000000	268000000	283000000	265000000	282000000	0.412422	0.0401256	-0.0105115	0.876203
Heterogeneous nuclear ribonucleoprotein L (hnRNP L)	Q8R081	14700000	15800000	20400000	18800000	18400000	21600000	0.362044	0.0463713	0.0291463	0.843826
Microsomal glutathione S-transferase 1 (Microsomal GST-1) (EC 2.5.1.18) (Microsomal GST-I)	Q91VS7	5400000	6180000	2360000	2930000	3700000	2080000	-1.1303	0.0227864	0.127802	0.802231
Double zinc ribbon and ankyrin repeat-containing protein 1	Q8C008	48600000	49700000	73800000	83300000	70100000	94700000	0.67642	0.0254477	0.0690331	0.797796
Enoyl-CoA delta isomerase 1, mitochondrial (EC 5.3.3.8) (3,2-trans-enoyl-CoA isomerase) (Delta(3),Delta(2)-enoyl-CoA isomerase) (D3,D2-enoyl-CoA isomerase) (Dodecenoyl-CoA isomerase)	P42125	205000000	219000000	249000000	256000000	208000000	275000000	0.252219	0.0353724	-0.0642602	0.774994
Long-chain fatty acid transport protein 1 (FATP-1) (Fatty acid transport protein 1) (EC 6.2.1.-) (Solute carrier family 27 member 1)	Q60714	15900000	14000000	7720000	5350000	5980000	6240000	-1.19389	0.0310653	-0.0970149	0.755556
ATP synthase subunit f, mitochondrial	P56135	169000000	158000000	287000000	303000000	312000000	289000000	0.851424	0.00540626	0.02665	0.732502
Oxoglutarate dehydrogenase-like	E9Q7L0	60400000	60300000	36200000	30000000	33600000	35400000	-0.866523	0.012699	0.0597651	0.706802
Vacuolar protein sorting-associated protein 35 (Maternal-embryonic 3) (Vesicle protein sorting 35)	Q9EQH3	3820000	4240000	1460000	1330000	487000	4260000	-1.53051	0.00688819	0.766751	0.655843
MICOS complex subunit Mic26 (Apolipoprotein O) (MICOS complex subunit Mic23) (Protein FAM121B)	Q9DCZ4	32900000	33600000	49100000	48100000	49600000	45300000	0.547602	0.00157718	-0.0345482	0.654321
Clathrin heavy chain 1	Q68FD5	8110000	7640000	4960000	4580000	5190000	3330000	-0.723291	0.00934004	-0.163136	0.644847
Cadherin-2 (Neural cadherin) (N-cadherin) (CD antigen CD325)	P15116	4720000	3960000	6750000	7500000	6940000	8020000	0.715195	0.0348389	0.0701483	0.643297
3-ketoacyl-CoA thiolase, mitochondrial (EC 2.3.1.16) (Acetyl-CoA acyltransferase) (Beta-ketothiolase) (Mitochondrial 3-oxoacyl-CoA thiolase)	Q8BWT1	723000000	753000000	1180000000	1050000000	1120000000	1190000000	0.595351	0.0299119	0.0508491	0.642229
3-hydroxyisobutyrate dehydrogenase, mitochondrial (HIBADH) (EC 1.1.1.31)	Q99L13	30700000	31500000	46900000	52800000	46200000	49500000	0.680679	0.024294	-0.0590746	0.614026
26S proteasome non-ATPase regulatory subunit 2 (26S proteasome regulatory subunit RPN1) (26S proteasome regulatory subunit S2) (26S proteasome subunit p97)	Q8VDM4	4780000	4230000	3040000	2990000	10900000	1130000	-0.579369	0.0326715	0.996407	0.601688
Protein phosphatase 1 regulatory subunit 12B (Myosin phosphatase-targeting subunit 2) (Myosin phosphatase target subunit 2)	Q8BG95	3210000	3820000	257000	1180000	365000	477000	-2.29046	0.0369728	-0.771168	0.587736
Protein FEV (PC12 ETS domain-containing transcription factor 1) (PC12 ETS factor 1) (Pet-1) (mPet-1)	Q8QZW2	51200000	52500000	72900000	66200000	5430000	80300000	0.423707	0.0352182	-0.69825	0.551325
Mitochondrial peptide methionine sulfoxide reductase (EC 1.8.4.11) (Peptide-methionine (S)-S-oxide reductase) (Peptide Met(O) reductase) (Protein-methionine-S-oxide reductase) (PMSR)	Q9D6Y7	13600000	13700000	11200000	10500000	7610000	11200000	-0.331206	0.0155724	-0.206195	0.512255
Acyl-coenzyme A thioesterase 5 (Acyl-CoA thioesterase 5) (EC 3.1.2.2) (Peroxisomal acyl-coenzyme A thioester hydrolase Ic) (Peroxisomal acyl-CoA thioesterase Ic)	Q6Q2Z6	11800000	12500000	31900000	29500000	27400000	30700000	1.33728	0.0045101	-0.0797005	0.503577
Basement membrane-specific heparan sulfate proteoglycan core protein (HSPG) [Cleaved into: Endorepellin; LG3 peptide]	Q05793	228000	176000	572000	700000	1510000	548000	1.65467	0.0244111	0.694144	0.503034
Dynein, axonemal, heavy chain 11	E9Q7N9	1640000	1630000	902000	842000	798000	870000	-0.906891	0.00158511	-0.0642808	0.502577
Electron transfer flavoprotein subunit alpha, mitochondrial (Alpha-ETF)	Q99LC5	801000000	770000000	915000000	884000000	906000000	798000000	0.195512	0.0350411	-0.0782699	0.486861
ATP-binding cassette, sub-family C (CFTR/MRP), member 8	B2RUS7	4220000	4800000	8580000	7630000	7350000	7900000	0.845685	0.0231366	-0.0880748	0.47405
Serine/threonine-protein kinase PLK1 (EC 2.7.11.21) (Polo-like kinase 1) (PLK-1) (Serine/threonine-protein kinase 13) (STPK13)	Q07832	20100000	21300000	36800000	31600000	33200000	29000000	0.724366	0.0369174	-0.137082	0.451564
Integrin beta-1 (Fibronectin receptor subunit beta) (VLA-4 subunit beta) (CD antigen CD29)	P09055	4560000	4550000	5520000	5240000	5290000	5170000	0.240155	0.0276438	-0.0407952	0.428546
Long-chain-fatty-acid--CoA ligase 1 (EC 6.2.1.3) (Long-chain acyl-CoA synthetase 1) (LACS 1)	P41216	174000000	192000000	271000000	271000000	257000000	271000000	0.566449	0.0102984	-0.0377549	0.42265
Heat shock 70 kDa protein 4 (Heat shock 70-related protein APG-2)	Q61316	9170000	8830000	6700000	5610000	4830000	5890000	-0.548166	0.0379877	-0.199526	0.405436
Dehydrogenase/reductase SDR family member 4 (EC 1.1.1.184) (NADPH-dependent carbonyl reductase/NADP-retinol dehydrogenase) (CR) (PHCR) (NADPH-dependent retinol dehydrogenase/reductase) (NDRD) (mouNRDR) (Peroxisomal short-chain alcohol dehydrogenase) (PSCD)	Q99LB2	76900000	69000000	94500000	92200000	93900000	96900000	0.355742	0.0383455	0.0313392	0.391439
Spectrin beta, non-erythrocytic 5 (Fragment)	F6UCX4	5390000	5150000	4680000	4470000	4260000	4520000	-0.204031	0.048815	-0.0595508	0.38359
Cytochrome b (Complex III subunit 3) (Complex III subunit III) (Cytochrome b-c1 complex subunit 3) (Ubiquinol-cytochrome-c reductase complex cytochrome b subunit)	P00158	12600000	11000000	16500000	15500000	12900000	15700000	0.439285	0.0469303	-0.162057	0.371232
Glycine cleavage system H protein, mitochondrial (Lipoic acid-containing protein)	Q91WK5	5900000	5370000	7200000	7640000	6970000	7230000	0.397004	0.0352725	-0.0636002	0.337063
Saccharopine dehydrogenase-like oxidoreductase (EC 1.-.-.-)	Q8R127	6320000	3620000	11000000	11200000	8990000	10800000	1.15924	0.0454666	-0.165788	0.316715
Wolframin	P56695	1550000	1590000	3430000	2990000	2780000	2990000	1.03181	0.0176646	-0.154002	0.314039
Glutathione S-transferase P 1 (Gst P1) (EC 2.5.1.18) (GST YF-YF) (GST class-pi) (GST-piB) (Preadipocyte growth factor)	P19157	18800000	18700000	4530000	1340000	918000	576000	-2.67546	0.0100285	-1.97418	0.305795
Carnitine O-acetyltransferase (Carnitine acetylase) (EC 2.3.1.7) (Carnitine acetyltransferase) (CAT) (CrAT)	P47934	77300000	85400000	111000000	113000000	115000000	130000000	0.461284	0.0180253	0.129283	0.299611
Acyl-CoA dehydrogenase family member 11 (ACAD-11) (EC 1.3.99.-)	Q80XL6	2450000	1210000	4710000	5320000	5310000	5910000	1.45441	0.0439821	0.161751	0.298822
Peroxisomal multifunctional enzyme type 2 (MFE-2) (17-beta-hydroxysteroid dehydrogenase 4) (17-beta-HSD 4) (D-bifunctional protein) (DBP) (Multifunctional protein 2) (MPF-2) [Cleaved into: (3R)-hydroxyacyl-CoA dehydrogenase (EC 1.1.1.n12); Enoyl-CoA hydratase 2 (EC 4.2.1.107) (EC 4.2.1.119) (3-alpha,7-alpha,12-alpha-trihydroxy-5-beta-cholest-24-enoyl-CoA hydratase)]	P51660	8560000	10100000	15400000	14000000	16500000	15400000	0.655867	0.0355615	0.11774	0.295425
Adenosine kinase (AK) (EC 2.7.1.20) (Adenosine 5'-phosphotransferase)	P55264	7460000	6320000	1680000	2510000	977000	1650000	-1.71755	0.0209447	-0.673534	0.281075
Ceruloplasmin (EC 1.16.3.1) (Ferroxidase)	Q61147	1340000	1290000	476000	409000	611000	1290000	-1.57131	0.00228735	1.10301	0.274899
NAD(P)H dehydrogenase [quinone] 1 (EC 1.6.5.2) (Azoreductase) (DT-diaphorase) (DTD) (Menadione reductase) (NAD(P)H:quinone oxidoreductase 1) (Phylloquinone reductase) (Quinone reductase 1) (QR1)	Q64669	6800000	7270000	3410000	1990000	1800000	1360000	-1.38159	0.0284975	-0.773035	0.270849
Collagen, type VI, alpha 3	E9PWQ3	6490000	5300000	11300000	12200000	9280000	11100000	0.995097	0.0158493	-0.205507	0.264184
Homeobox protein Hox-B4 (Homeobox protein Hox-2.6)	P10284	15000000	14900000	18000000	18200000	18900000	18300000	0.275844	0.00125739	0.0393129	0.254644
28S ribosomal protein S29, mitochondrial (MRP-S29) (S29mt) (Death-associated protein 3) (DAP-3)	Q9ER88	1480000	1550000	781000	680000	604000	664000	-1.05236	0.00607835	-0.204401	0.242123
Non-specific lipid-transfer protein (NSL-TP) (EC 2.3.1.176) (Propanoyl-CoA C-acyltransferase) (SCP-chi) (SCPX) (Sterol carrier protein 2) (SCP-2) (Sterol carrier protein X) (SCP-X)	P32020	26300000	28500000	43200000	40400000	43700000	45000000	0.609327	0.0149456	0.0854312	0.240328
Propionyl-CoA carboxylase alpha chain, mitochondrial (PCCase subunit alpha) (EC 6.4.1.3) (Propanoyl-CoA:carbon dioxide ligase subunit alpha)	Q91ZA3	49900000	42300000	86200000	77700000	87700000	96000000	0.829977	0.0243688	0.164536	0.237513
Ornithine aminotransferase, mitochondrial (EC 2.6.1.13) (Ornithine--oxo-acid aminotransferase)	P29758	16200000	13900000	21600000	21300000	18100000	20600000	0.511214	0.0313032	-0.148644	0.237246
Carnitine O-palmitoyltransferase 2, mitochondrial (EC 2.3.1.21) (Carnitine palmitoyltransferase II) (CPT II)	P52825	107000000	106000000	140000000	135000000	130000000	134000000	0.368578	0.00669593	-0.0588937	0.227951
Creatine kinase B-type (EC 2.7.3.2) (B-CK) (Creatine kinase B chain) (Creatine phosphokinase B-type) (CPK-B)	Q04447	10800000	8470000	1210000	2500000	287000	930000	-2.37687	0.0280686	-1.60809	0.225842
Histone H2B type 1-C/E/G	Q6ZWY9	152000000	132000000	190000000	193000000	169000000	185000000	0.431453	0.0392876	-0.113595	0.216788
Acyl-coenzyme A thioesterase 2, mitochondrial (Acyl-CoA thioesterase 2) (EC 3.1.2.2) (Acyl coenzyme A thioester hydrolase) (MTE-I) (Very-long-chain acyl-CoA thioesterase)	Q9QYR9	92500000	96900000	201000000	170000000	212000000	218000000	0.969983	0.0284641	0.212917	0.20263
Protein piccolo (Aczonin) (Brain-derived HLMN protein) (Multidomain presynaptic cytomatrix protein)	Q9QYX7	2860000	2490000	1790000	1550000	1190000	1460000	-0.679691	0.0449232	-0.333856	0.196315
60S ribosomal protein L24	Q8BP67	6140000	6210000	5040000	4680000	4540000	4130000	-0.345483	0.0188957	-0.164924	0.194189
SH3 domain-binding glutamic acid-rich protein (SH3BGR protein)	Q9WUZ7	13700000	17400000	2680000	1880000	1340000	1570000	-2.76981	0.0197439	-0.648015	0.185947
Rho GDP-dissociation inhibitor 1 (Rho GDI 1) (GDI-1) (Rho-GDI alpha)	Q99PT1	5710000	4610000	2780000	2550000	1700000	2310000	-0.953236	0.0471597	-0.410533	0.180172
Hsc70-interacting protein (Hip) (Protein FAM10A1) (Protein ST13 homolog)	Q99L47	1920000	2170000	1180000	964000	495000	821000	-0.931796	0.0276352	-0.704145	0.168437
GRB10-interacting GYF protein 2 (PERQ amino acid-rich with GYF domain-containing protein 2) (Trinucleotide repeat-containing gene 15 protein)	Q6Y7W8	6950000	6430000	9640000	10400000	10800000	11000000	0.582804	0.0185869	0.121446	0.154471
ATP-dependent RNA helicase DDX1 (EC 3.6.4.13) (DEAD box protein 1)	Q91VR5	697000	629000	360000	265000	153000	216000	-1.08515	0.0266695	-0.760235	0.153801
Ras-related protein Rab-1A (YPT1-related protein)	P62821	41900	57200	517000	422000	608000	566000	3.24417	0.0128725	0.322235	0.152033
Predicted readthrough transcript (NMD candidate), 44503	E9PYU5	2870000	2700000	3810000	3830000	4150000	3950000	0.455895	0.00676862	0.0843493	0.149314
cAMP-dependent protein kinase type I-alpha regulatory subunit [Cleaved into: cAMP-dependent protein kinase type I-alpha regulatory subunit, N-terminally processed]	Q9DBC7	7430000	5750000	2880000	2140000	405000	1490000	-1.39259	0.047067	-1.40549	0.140369
60S ribosomal protein L3 (J1 protein)	P27659	2270000	1760000	768000	611000	889000	879000	-1.54716	0.0382103	0.358496	0.131945
Estradiol 17-beta-dehydrogenase 11 (EC 1.1.1.62) (17-beta-hydroxysteroid dehydrogenase 11) (17-beta-HSD 11) (17bHSD11) (17betaHSD11) (17-beta-hydroxysteroid dehydrogenase XI) (17-beta-HSD XI) (17betaHSDXI) (Dehydrogenase/reductase SDR family member 8)	Q9EQ06	833000	169000	2280000	2040000	2450000	2560000	2.10815	0.0424199	0.213779	0.120502
Nucleosome assembly protein 1-like 4	Q78ZA7	12800000	8620000	1000000	1910000	201000	136000	-2.87987	0.0494824	-3.1102	0.106089
40S ribosomal protein S3 (EC 4.2.99.18)	P62908	17800000	17100000	14500000	13500000	12500000	12600000	-0.3178	0.0298994	-0.157739	0.102042
Trifunctional enzyme subunit beta, mitochondrial (TP-beta) [Includes: 3-ketoacyl-CoA thiolase (EC 2.3.1.16) (Acetyl-CoA acyltransferase) (Beta-ketothiolase)]	Q99JY0	540000000	550000000	901000000	932000000	963000000	986000000	0.749879	0.00191641	0.0885273	0.0951847
Hexokinase-1 (EC 2.7.1.1) (Hexokinase type I) (HK I) (Hexokinase, tumor isozyme)	P17710	26300000	29000000	20200000	17500000	14400000	13900000	-0.552715	0.0439864	-0.413762	0.0757625
Proteasome subunit alpha type-2 (EC 3.4.25.1) (Macropain subunit C3) (Multicatalytic endopeptidase complex subunit C3) (Proteasome component C3)	P49722	2250000	2520000	1440000	1500000	551000	960000	-0.698173	0.0220893	-0.960312	0.074456
Beta-enolase (EC 4.2.1.11) (2-phospho-D-glycerate hydro-lyase) (Enolase 3) (Muscle-specific enolase) (MSE) (Skeletal muscle enolase)	P21550	349000000	384000000	261000000	219000000	115000000	157000000	-0.610779	0.0436611	-0.819428	0.0727582
[Pyruvate dehydrogenase (acetyl-transferring)] kinase isozyme 4, mitochondrial (EC 2.7.11.2) (Pyruvate dehydrogenase kinase isoform 4)	O70571	4710000	2370000	16900000	20200000	12900000	12300000	2.3896	0.0176796	-0.557995	0.0710776
Trifunctional enzyme subunit alpha, mitochondrial (TP-alpha) [Includes: Long-chain enoyl-CoA hydratase (EC 4.2.1.17); Long chain 3-hydroxyacyl-CoA dehydrogenase (EC 1.1.1.211)]	Q8BMS1	764000000	754000000	1100000000	1090000000	1190000000	1260000000	0.528759	0.000442591	0.161851	0.0666544
Nuclear autoantigenic sperm protein (NASP)	Q99MD9	845000	777000	1530000	1730000	1210000	1260000	1.0071	0.0162281	-0.400361	0.0618477
Sarcalumenin	Q7TQ48	297000000	282000000	363000000	343000000	397000000	391000000	0.286105	0.036634	0.158527	0.0591479
UTP--glucose-1-phosphate uridylyltransferase (EC 2.7.7.9) (UDP-glucose pyrophosphorylase) (UDPGP) (UGPase)	Q91ZJ5	27500000	25500000	12900000	15600000	2920000	6810000	-0.89503	0.0182943	-1.55045	0.058147
Tubulin alpha-4A chain (Alpha-tubulin 4) (Alpha-tubulin isotype M-alpha-4) (Tubulin alpha-4 chain)	P68368	37900000	41500000	24000000	19800000	5490000	10700000	-0.858208	0.023304	-1.43583	0.0540305
Glucose-6-phosphate isomerase (GPI) (EC 5.3.1.9) (Autocrine motility factor) (AMF) (Neuroleukin) (NLK) (Phosphoglucose isomerase) (PGI) (Phosphohexose isomerase) (PHI)	P06745	73000000	74300000	38800000	40800000	20200000	27600000	-0.887917	0.00123916	-0.735758	0.0534876
Ras-related protein Rab-7a	P51150	2340000	2310000	1010000	1200000	462000	609000	-1.07318	0.00615739	-1.04509	0.0417193
Glyceraldehyde-3-phosphate dehydrogenase (GAPDH) (EC 1.2.1.12) (Peptidyl-cysteine S-nitrosylase GAPDH) (EC 2.6.99.-)	P16858	712000000	798000000	491000000	403000000	158000000	214000000	-0.756202	0.0376598	-1.26497	0.0376862
Calpain-2 catalytic subunit (EC 3.4.22.53) (80 kDa M-calpain subunit) (CALP80) (Calcium-activated neutral proteinase 2) (CANP 2) (Calpain M-type) (Calpain-2 large subunit) (Millimolar-calpain) (M-calpain)	O08529	1580000	1310000	765000	616000	127000	196000	-1.06536	0.0393178	-2.09611	0.0232501
Short/branched chain specific acyl-CoA dehydrogenase, mitochondrial (SBCAD) (EC 1.3.8.5) (2-methyl branched chain acyl-CoA dehydrogenase) (2-MEBCAD) (2-methylbutyryl-coenzyme A dehydrogenase) (2-methylbutyryl-CoA dehydrogenase)	Q9DBL1	20700000	19600000	17600000	17500000	13000000	14200000	-0.199309	0.0422777	-0.367864	0.0224539
Gap junction alpha-1 protein (Connexin-43) (Cx43) (Gap junction 43 kDa heart protein)	P23242	8050000	8160000	11000000	11400000	7130000	6070000	0.466615	0.00446155	-0.762961	0.0148289
Proteasome subunit alpha type-6 (EC 3.4.25.1) (Macropain iota chain) (Multicatalytic endopeptidase complex iota chain) (Proteasome iota chain)	Q9QUM9	6390000	6260000	3620000	3300000	1310000	1670000	-0.870293	0.00361387	-1.21546	0.0146181
Omega-amidase NIT2 (EC 3.5.1.3) (Nitrilase homolog 2)	Q9JHW2	3550000	3630000	4200000	4150000	3780000	3850000	0.217792	0.00643884	-0.130093	0.0139761
Dysferlin (Dystrophy-associated fer-1-like protein) (Fer-1-like protein 1)	Q9ESD7	1560000	1420000	2300000	2490000	5760000	5100000	0.684713	0.0165803	1.18093	0.0125616
Peptidyl-prolyl cis-trans isomerase FKBP1A (PPIase FKBP1A) (EC 5.2.1.8) (12 kDa FK506-binding protein) (12 kDa FKBP) (FKBP-12) (Calstabin-1) (FK506-binding protein 1A) (FKBP-1A) (Immunophilin FKBP12) (Rotamase)	P26883	17300000	16400000	12700000	13400000	4080000	5770000	-0.368699	0.0217745	-1.40585	0.0124357
Creatine kinase S-type, mitochondrial (EC 2.7.3.2) (Basic-type mitochondrial creatine kinase) (Mib-CK) (Sarcomeric mitochondrial creatine kinase) (S-MtCK)	Q6P8J7	1580000000	1550000000	1400000000	1400000000	1360000000	1350000000	-0.160736	0.0081634	-0.047134	0.0121217
Desmin	P31001	391000000	402000000	317000000	337000000	204000000	197000000	-0.27803	0.0259216	-0.705688	0.00694168
Protein-glutamine gamma-glutamyltransferase 2 (EC 2.3.2.13) (Tissue transglutaminase) (Transglutaminase C) (TG(C)) (TGC) (TGase C) (Transglutaminase-2) (TGase-2)	P21981	33300000	36200000	13900000	13300000	6260000	7120000	-1.35341	0.00486564	-1.02353	0.00570805
Very long-chain specific acyl-CoA dehydrogenase, mitochondrial (EC 1.3.8.9) (MVLCAD) (VLCAD)	P50544	403000000	394000000	589000000	588000000	660000000	652000000	0.562463	0.000567384	0.156653	0.00354756

## Sheet: Transcriptomics
gene_name	chr	start	end	strand	Length	Copies	CTR#1	CTR#2	T2D+AAV-ctr #1	T2D+AAV-ctr #2	T2D+AAV-dnMCUb#1	T2D+AAV-dnMCUb#2	T2D+AAV-ctr vs. CTR Log2 Fold Change	T2D+AAV-ctr vs. CTR-ctr p-value	T2D+AAV-ctr vs. CTR adj. p-value	T2D+AAV-ctr vs. T2D+AAV-dnMCUb Log2 Fold Change	T2D+AAV-ctr vs. T2D+AAV-dnMCUb p-value	T2D+AAV-ctr vs. T2D+AAV-dnMCUb adj. p-value
Abat	chr16	8513429	8621568	+	4605	1	9.0812	9.13881	8.44106	8.32182	8.45972	7.96416	-1.46633	9.41585e-22	1.28639e-17	-0.377169	0.602627	0.99993
Acot2	chr12	83987861	83993873	+	2191	1	10.9934	10.9295	11.53	11.5119	11.2669	11.6279	0.870845	1.78958e-20	1.22247e-16	-0.085643	0.606677	0.99993
Rhobtb1	chr10	69212634	69291791	+	4331	1	10.6093	10.5468	11.1456	11.133	11.1505	11.3303	0.903559	1.66988e-19	7.60463e-16	0.162452	0.243626	0.99993
Tuba4a	chr1	75214972	75218624	-	2076	1	13.7223	13.7147	13.2673	13.1636	13.1196	13.3749	-0.719161	1.6949e-18	5.78892e-15	0.0586283	0.681352	0.99993
Lrrc4b	chr7	44442485	44463351	+	2723	1	8.13884	8.0935	7.439	7.51834	7.48338	7.75849	-1.79578	2.44444e-18	6.6792e-15	0.548378	0.104185	0.99993
Ndrg4	chr8	95678085	95714956	+	3068	1	12.3623	12.4474	11.9521	11.7777	11.8038	12.2121	-0.794321	5.75661e-15	1.31078e-11	0.242152	0.176282	0.99993
Myom2	chr8	15057653	15133541	+	5002	1	14.6803	14.6447	14.2713	14.2574	14.1472	14.7786	-0.565398	7.92753e-15	1.54723e-11	0.348315	0.418417	0.99993
Gpam	chr19	55069734	55099451	-	3791	1	12.341	12.3018	12.8147	12.6678	12.4691	12.692	0.6181	2.31424e-11	3.95215e-08	-0.22476	0.114572	0.99993
Tuba8	chr6	121210696	121226854	+	2254	1	11.4121	11.6241	11.0634	11.0199	10.9761	11.2326	-0.740052	3.81662e-11	5.79363e-08	0.113705	0.465179	0.99993
Scd4	chr19	44333092	44346743	+	3295	1	8.48803	8.35194	8.85573	8.97898	8.93411	9.2582	1.17563	4.26523e-10	5.82716e-07	0.375273	0.0837313	0.99993
Pdk4	chr6	5483351	5496309	-	3463	1	12.6727	12.312	13.7084	13.7107	13.486	13.9948	1.78556	5.32813e-10	6.61753e-07	0.0853172	0.805279	0.99993
Acot1	chr12	84009490	84018371	+	2267	1	8.46847	8.24843	8.84948	8.91935	8.82776	9.05634	1.23412	1.25858e-09	1.43289e-06	0.129708	0.516197	0.99993
Dbp	chr7	45705088	45710203	+	1830	1	9.70419	9.92824	10.3214	10.2335	10.1659	10.3899	0.793013	2.30783e-08	2.42535e-05	0.0116852	0.942609	0.99993
Hmgcs2	chr3	98280435	98310738	+	3271	1	9.3486	9.04794	10.2247	10.2841	10.3228	11.1301	2.0138	2.84049e-08	2.77191e-05	0.843254	0.140938	0.99993
Epha4	chr1	77367185	77515088	-	6293	1	11.3073	11.2275	10.958	10.8847	10.8755	10.7819	-0.535101	5.72009e-08	5.20986e-05	-0.143846	0.300278	0.99993
Ephx2	chr14	66084377	66124500	-	1998	1	12.6882	12.6097	12.991	12.9222	12.8147	13.1603	0.448732	1.21877e-07	0.000101238	0.0658109	0.671904	0.99993
Pde1c	chr6	56069804	56362392	-	3870	1	9.49395	9.3936	9.02209	9.09273	9.01314	9.29938	-0.753095	1.25973e-07	0.000101238	0.225117	0.292109	0.99993
Serpine1	chr5	137061504	137072259	-	2994	1	9.06863	8.97502	9.41896	9.39268	9.54642	9.85406	0.769861	1.45076e-07	0.000110112	0.546365	0.00373697	0.99993
Eno3	chr11	70657202	70662513	+	1431	1	14.3767	14.2957	14.0745	14.0062	13.9057	14.1273	-0.42087	1.54722e-07	0.000111253	-0.0239052	0.857758	0.99993
Lgals4	chr7	28833854	28841708	+	1365	1	9.21013	9.15325	9.83054	9.47788	9.49909	9.85195	0.93693	2.08388e-07	0.00014235	0.0413277	0.856026	0.99993
Scgb1c1	chr7	140845547	140846769	+	450	1	6.02402	6.08055	5.77155	5.76198	5.74922	5.84958	-1.89344	2.38544e-07	0.00015519	0.364348	0.521295	0.99993
Arntl	chr7	113207465	113314126	+	2869	1	8.3989	8.35338	7.96518	8.0332	8.08597	7.78274	-0.919293	2.76131e-07	0.000171478	-0.157153	0.606258	0.99993
Vwa8	chr14	78849052	79202310	+	6965	1	12.901	12.7959	13.1652	13.122	12.9723	13.2871	0.425882	5.59981e-07	0.000332629	-0.0013123	0.992969	0.99993
Abca1	chr4	53030787	53159895	-	10163	1	10.8051	10.8122	11.2012	11.0627	11.0842	10.919	0.510737	1.13914e-06	0.000648454	-0.196052	0.18426	0.99993
Irs1	chr1	82233101	82291416	-	9141	1	10.4126	10.3903	10.0627	10.1187	9.96354	10.0282	-0.515806	1.85074e-06	0.00101139	-0.163106	0.279364	0.99993
Adcy1	chr11	7063489	7178506	+	12220	1	7.59831	7.64684	7.32438	7.23839	7.32642	7.34031	-1.08577	1.97694e-06	0.00103881	0.199954	0.50332	0.99993
Grk5	chr19	60889749	61092553	+	3134	1	8.93828	8.89719	9.19937	9.33094	9.22686	9.10314	0.710259	2.70866e-06	0.00136278	-0.189659	0.297261	0.99993
Cat	chr2	103453849	103485160	-	2588	1	12.2542	12.2364	12.5399	12.4777	12.3662	12.5861	0.387176	2.793e-06	0.00136278	-0.0370777	0.786748	0.99993
G0s2	chr1	193272161	193273217	-	868	1	9.85038	9.752	9.50107	9.45417	9.71587	9.81737	-0.598653	4.27136e-06	0.00201225	0.540714	0.000913046	0.653601
Cpxm2	chr7	132042816	132154739	-	3471	1	9.19753	9.15342	8.83396	8.86761	8.92285	8.49414	-0.639452	4.85122e-06	0.00220925	-0.262986	0.32845	0.99993
Otud1	chr2	19657752	19660583	+	2831	1	8.48624	8.51304	9.08691	8.72875	8.99742	8.9222	0.956396	7.07805e-06	0.00311937	0.0800331	0.724523	0.99993
Aox1	chr1	58029931	58106413	+	4354	1	9.68393	9.58636	10.0509	9.89222	9.80002	9.7635	0.598499	9.12773e-06	0.00389697	-0.330777	0.0385364	0.99993
Slc25a4	chr8	46206797	46211284	-	1918	1	16.4653	16.4175	16.236	16.187	16.0839	16.3046	-0.324558	1.03511e-05	0.00428536	-0.0139175	0.915149	0.99993
Ripor2	chr13	24638696	24706001	+	3342	1	7.36277	7.28419	7.05096	6.99565	7.00908	7.12462	-1.08979	1.35575e-05	0.00544773	0.202115	0.549036	0.99993
Comt	chr16	18407544	18426604	-	1386	1	10.8535	10.8879	11.3099	11.08	11.0386	11.1085	0.515249	1.40006e-05	0.00546504	-0.191779	0.200048	0.99993
Svep1	chr4	58042442	58206596	-	11534	1	9.51507	9.70872	9.92348	9.98883	9.88505	9.89337	0.607227	1.49297e-05	0.00566581	-0.112576	0.448592	0.99993
Ccr2	chr9	124102183	124108550	+	2994	1	7.5384	7.49576	7.85499	7.7867	7.72671	7.9098	0.958503	1.73656e-05	0.00641212	0.00600305	0.980658	0.99993
Ckm	chr7	19411063	19421584	+	1222	1	14.9965	14.9105	14.748	14.6766	14.5343	14.7588	-0.342285	1.9137e-05	0.00688027	-0.0835796	0.52992	0.99993
Hspa5	chr2	34771970	34777547	+	3655	1	13.6565	13.652	13.4027	13.4558	13.478	13.6298	-0.324177	1.99983e-05	0.00700554	0.186365	0.133133	0.99993
Oxct1	chr15	4026383	4155344	+	3494	1	14.7664	14.7615	14.5763	14.4844	14.3001	14.3344	-0.328336	2.39139e-05	0.00796859	-0.302969	0.00849508	0.99993
Nr1d2	chr14	18204054	18239127	-	4648	1	11.5166	11.5347	11.8096	11.7383	11.7148	11.85	0.375457	2.71734e-05	0.00883913	0.0180665	0.890102	0.99993
Chrna2	chr14	66140933	66152948	+	3541	1	6.33041	6.31824	6.51149	6.6061	6.52304	6.73552	1.55474	3.46645e-05	0.0110136	0.327671	0.370864	0.99993
Scn4a	chr11	106318592	106349389	-	6551	1	9.77017	9.69295	10.066	9.97284	9.65332	9.78086	0.502964	4.60973e-05	0.0136909	-0.527696	0.000993315	0.653601
Doc2g	chr19	4003336	4007005	+	1425	1	11.2646	11.3785	11.1115	10.8549	10.8416	11.0803	-0.51231	4.53329e-05	0.0136909	-0.0336954	0.845217	0.99993
Slc41a3	chr6	90619147	90646412	+	2305	1	10.6609	10.4103	10.2058	10.2264	10.1071	10.1777	-0.538136	4.44856e-05	0.0136909	-0.12367	0.400834	0.99993
Pex11a	chr7	79735957	79743080	-	2236	1	8.30334	8.23803	8.59212	8.5406	8.45998	8.58655	0.717542	5.36594e-05	0.0152728	-0.090209	0.654904	0.99993
Agrn	chr4	156165290	156185901	-	4788	1	9.34367	9.33191	9.67908	9.57287	9.56358	9.51303	0.543831	5.31695e-05	0.0152728	-0.157384	0.333531	0.99993
Hk1	chr10	62269108	62358362	-	3600	1	11.4016	11.406	11.0605	11.209	11.0934	11.1491	-0.409563	5.96193e-05	0.0166228	-0.0216217	0.876964	0.99993
Armh4	chr14	49675952	49783383	-	8816	1	9.44305	9.34129	9.62738	9.76167	9.68256	9.70129	0.568433	6.19223e-05	0.0169197	-0.00506946	0.974994	0.99993
Manf	chr9	106888753	106891415	-	955	1	9.01277	9.09587	8.70954	8.8034	8.96427	9.09881	-0.637395	6.40369e-05	0.0171543	0.597752	0.00243857	0.802291
Lpin1	chr12	16535669	16589770	-	5540	1	12.113	12.172	11.9143	11.9201	11.7827	11.7784	-0.334691	7.00432e-05	0.0184025	-0.203131	0.0923676	0.99993
Alas1	chr9	106233927	106247856	-	2108	1	11.9988	12.1284	11.6435	11.8741	11.8015	11.9942	-0.451944	9.47578e-05	0.0239737	0.210839	0.174176	0.99993
Mybpc3	chr2	91118144	91136510	+	4085	1	16.1955	16.283	16.065	15.9654	15.8133	16.0068	-0.314842	0.000121159	0.0295585	-0.14152	0.273271	0.99993
Krt222	chr11	99233890	99244085	-	2031	1	8.97589	8.96365	8.71715	8.67614	8.64482	8.69957	-0.573176	0.000119539	0.0295585	-0.0525984	0.788717	0.99993
Pde11a	chr2	75989912	76338774	-	4150	1	6.7416	6.73841	6.96441	6.9913	6.92575	7.04697	1.1168	0.000136129	0.0326279	0.041447	0.888895	0.99993
Myl2	chr5	122100951	122106854	+	649	1	17.359	17.2572	17.1265	17.0595	16.9568	17.2338	-0.304035	0.000145324	0.0342312	0.0178993	0.897866	0.99993
Gnb3	chr6	124834240	124840275	-	1827	1	6.51479	6.59162	6.33733	6.2811	6.24378	6.29025	-1.14437	0.00015435	0.0357412	-0.291002	0.496585	0.99993
Decr1	chr4	15917240	15945507	-	2940	1	13.5441	13.4014	13.7394	13.6777	13.5843	13.8806	0.335303	0.000173693	0.0395499	0.0503446	0.728082	0.99993
Snhg11	chr2	158375638	158386145	+	5855	1	4.7391	4.71668	4.96007	4.81379	4.78815	4.70919	2.31501	0.000181433	0.0399796	-1.77126	0.0130076	0.99993
Cngb3	chr4	19280850	19510623	+	4673	1	5.7652	5.80124	5.56173	5.60311	5.57239	5.67104	-1.49895	0.000180174	0.0399796	0.428613	0.450492	0.99993
Tnnc1	chr14	31208332	31210998	+	653	1	13.5707	13.652	13.4296	13.3719	13.2172	13.3444	-0.301731	0.000189061	0.0409992	-0.168056	0.167651	0.99993
Ptp4a3	chr15	73748374	73758766	+	3249	1	11.6017	11.5444	11.7481	11.8628	11.7812	11.9902	0.353253	0.000212306	0.0439933	0.127349	0.372545	0.99993
Myl12a	chr17	70994294	70998012	-	973	1	12.8694	12.931	13.1063	13.1013	12.9496	13.05	0.291826	0.00021021	0.0439933	-0.144512	0.221509	0.99993
Dbi	chr1	120113280	120121078	-	562	1	10.9634	10.8696	11.1782	11.1302	11.1159	11.2503	0.371355	0.000220054	0.0448713	0.0504508	0.709371	0.99993
Kcnv2	chr19	27322588	27337179	+	5105	1	8.19326	8.21815	8.59622	8.39529	8.30342	8.27704	0.712529	0.000237885	0.047123	-0.492488	0.0257413	0.99993
Tceal8	chrX	136170081	136172342	-	1245	1	8.33982	8.36065	8.03221	8.1256	8.31868	8.23231	-0.689971	0.000237995	0.047123	0.521347	0.0231936	0.99993
Apln	chrX	48025146	48034853	-	3144	1	8.4172	8.50918	8.16467	8.21908	8.14631	8.02155	-0.64776	0.000243803	0.0475834	-0.292228	0.230942	0.99993
Me1	chr9	86581371	86695953	-	3261	1	9.95736	9.9031	10.1897	10.1597	10.0466	10.1167	0.419889	0.000248376	0.0477931	-0.153793	0.291086	0.99993
Gja1	chr10	56377330	56390415	+	3068	1	13.5639	13.5021	13.2934	13.364	13.2101	13.275	-0.29376	0.000257691	0.0488968	-0.122146	0.298905	0.99993

## Sheet: Phosphoproteomics
Protein	Uniprot ID	PHOSPHOSITE(s)	CTR#1	CTR#2	T2D+AAV-ctr #1	T2D+AAV-ctr #2	T2D+AAV-dnMCUb#1	T2D+AAV-dnMCUb#2	T2D+AAV-ctr vs. CTR Log2 Fold Change	T2D+AAV-dnMCUb vs. T2D+AAV-ctr Log2 Fold Change	T2D+AAV-ctr vs. CTR-ctr p-value	T2D+AAV-dnMCUb vs. T2D+AAV-ctr p-value
Monocarboxylate transporter 1	P53986	S461	0.0158721	0.167331	0.0352406	0.0348092	2.15972	0.14898	1.38699	5.04256	0.532902	0.381431
Striated muscle-specific serine/threonine-protein kinase	Q62407	S2114	0.00883562	0.479436	0.0471676	0.0286996	1.81955	0.371257	2.68614	4.85184	0.47356	0.281677
Glycogen [starch] synthase, muscle	Q9Z1E4	S652, S657	0.0114384	0.251185	0.00145752	0.493573	2.70899	4.0641	-0.914524	3.77423	0.712469	0.0488991
CAP-Gly domain-containing linker protein 1	Q922J3	S347	9.42029	5.65126	12.9018	6.99275	31.75	147.246	-0.400545	3.16948	0.56246	0.302708
2-oxoisovalerate dehydrogenase subunit alpha, mitochondrial	P50136	S/T 334/5	0.262595	0.587571	0.627119	0.564626	5.22222	4.17822	-0.487258	2.97965	0.410462	0.0158485
Sodium/potassium-transporting ATPase subunit alpha-2	Q6PIE5	S214	0.0541012	0.116195	0.00557143	0.0689944	0.167877	0.276812	1.19146	2.57621	0.393583	0.099054
Dynein, axonemal, heavy chain 14	A0A140LIJ4	S495	0.0568098	0.113043	0.00733662	0.0242842	0.0613532	0.116303	2.42534	2.49014	0.142836	0.126331
Sodium/potassium-transporting ATPase subunit alpha-1	Q8VDN2	S216	0.0333333	0.0438835	0.00364061	0.0287879	0.0958549	0.0855543	1.25165	2.48391	0.242222	0.0316988
Nucleosome assembly protein 1-like 4	Q78ZA7	T111, S121	1.73945	3.51044	21.715	8.58115	64.8756	103.971	-2.52877	2.4785	0.199348	0.0783369
Protein phosphatase 1 regulatory subunit 3A	Q99MR9	S599	0.101515	0.0565	0.0407182	0.0397647	0.138186	0.293229	0.973308	2.42232	0.227216	0.151933
Methionine-R-sulfoxide reductase B2, mitochondrial	Q78J03	S115	0.0614706	0.0989916	0.0414752	0.0698113	0.340451	0.237209	0.527954	2.37594	0.405394	0.0488662
Heat shock protein HSP 90-alpha	P07901	S231	0.0169391	20.6909	5.17391	7.02041	18.6047	31.307	0.763968	2.03317	0.721448	0.0989277
Obscurin	A2AAJ9	T6507	0.00445089	0.00820276	0.00274118	0.00141322	0.00868421	0.00696229	1.60684	1.91313	0.166248	0.0339884
Sorbin and SH3 domain-containing protein 1	Q62417	S376	0.467045	0.293976	0.374603	0.0233568	0.742604	0.740566	0.935314	1.89799	0.451709	0.0907315
Sorbin and SH3 domain-containing protein 1	Q62417	T905	0.625	0.431928	0.384127	0.66784	1.75148	2.00236	0.00678676	1.83528	0.98978	0.0190874
2-oxoglutarate dehydrogenase, mitochondrial	Q60597	Y460	0.000698551	0.00062249	0.00057377	0.000520619	0.00102073	0.00268786	0.271549	1.76074	0.134588	0.257569
Cytochrome c oxidase subunit NDUFA4	Q62425	S67	0.00665236	0.0046988	0.0138519	0.0224091	0.0648536	0.0572864	-1.67558	1.75205	0.104973	0.0172366
Phosphoglucomutase-1	Q9D0F9	S505	0.058794	0.0721649	0.00942675	0.00703297	0.0146721	0.0405988	2.9921	1.74758	0.0137838	0.274545
OCIA domain-containing protein 1	Q9CRD0	S139	0.0464806	0.0042766	0.104065	0.555944	1.11538	1.08333	-3.7008	1.7361	0.311542	0.076823
Uncharacterized protein C6orf203 homolog	Q9CQF4	S106	5.38806	50.3304	31.3281	23.8776	32.1081	140.984	0.0133387	1.64865	0.992041	0.392984
LIM domain only 7	E9PYF4	S701	1.25806	2.17557	1.73786	1.16237	5.64593	3.4375	0.24357	1.64707	0.671123	0.113502
Actin-binding LIM protein 1	Q8K4G5	S789	0.514815	0.576048	0.642424	0.637658	1.42	2.58182	-0.230767	1.64442	0.091177	0.143902
Obscurin	A2AAJ9	S6294, S6302	0.00950893	0.00723502	0.00721569	0.0109504	0.0138947	0.0427244	-0.117609	1.64004	0.775866	0.316905
Plakophilin 2	Q9CQ73	S151, S154/155	0.563973	0.57916	1.29873	0.802649	4.33625	1.96617	-0.878344	1.58457	0.193266	0.224888
Beta-2-syntrophin	Q61235	S90	2.91105	2.07661	4.15	4.33514	12.9487	12.4776	-0.766573	1.58331	0.0548559	0.000891532
Cytochrome c oxidase subunit 4 isoform 1, mitochondrial	P19783	S157	0.00143711	0.00127461	0.00261404	0.0048	0.0127405	0.00918033	-1.45105	1.56397	0.165099	0.0738625
PGC-1 and ERR-induced regulator in muscle protein 1	Q149B8	S151	1.29101	2.3	1.17864	0.825112	4.1342	1.71681	0.841689	1.54598	0.27593	0.255988
Actin-binding LIM protein 1	Q8K4G5	T495/S496	1.18498	0.887226	1.28662	1.86709	3.74183	5.45556	-0.605881	1.54418	0.23922	0.0791357
Actin-binding LIM protein 1	Q8K4G5	S738	0.47037	0.41497	0.34697	0.498418	0.77	1.6	0.0666197	1.4872	0.827442	0.212496
Apoptosis-inducing factor 1, mitochondrial	Q9Z0X1	S529/S531	0.00631884	0.00264138	0.0140306	0.0141791	0.04225	0.0349351	-1.65459	1.45213	0.0346668	0.0215971
ATP synthase subunit delta, mitochondrial	Q9D3D9	S139	0.0005	0.000282955	9.59951e-05	0.000446784	0.000721274	0.000743316	0.528564	1.43206	0.619299	0.119811
NADH dehydrogenase [ubiquinone] 1 beta subcomplex subunit 5, mitochondrial	Q9CQH3	S182	0.0248201	0.03048	0.038125	0.0641803	0.146417	0.128846	-0.887526	1.42793	0.219966	0.0314651
BAG family molecular chaperone regulator 3	Q9JLV1	S360	0.0277305	0.0336408	0.028503	0.0186614	0.0736162	0.052993	0.379865	1.42461	0.341464	0.0737043
Actin-binding LIM protein 1	Q8K4G5	S475/T477	4.85247	3.6318	4.89042	7.29486	13.0723	19.4576	-0.522277	1.41662	0.303556	0.0964741
ADP/ATP translocase 1	P48962	S42	0.00404348	0.00307	0.00402825	0.0033046	0.00953757	0.01	-0.0438181	1.41381	0.873153	0.00491474
Myosin-binding protein C, cardiac-type	O70468	S402	0.00290557	0.00062212	0.000311164	0.0023956	0.00204819	0.00515625	0.382152	1.41232	0.815474	0.352426
Oxoglutarate dehydrogenase-like	E9Q7L0	Y466	0.00399007	0.00257048	0.0038674	0.00336667	0.0058631	0.0131356	-0.140991	1.39302	0.698355	0.247904
Obscurin	A2AAJ9	S6609	0.0709821	0.0283871	0.0294902	0.0119008	0.0222632	0.0839873	1.26348	1.36008	0.335334	0.418605
Heat shock protein HSP 90-alpha	P07901	S252, S263	5.15453	8.21018	13.2076	9.84388	29.1505	29.9757	-0.786431	1.35894	0.166718	0.00909204
Apoptosis-inducing factor 1, mitochondrial	Q9Z0X1	S115, S121	0.0105	0.00505172	0.0147177	0.0194366	0.0423929	0.0439058	-1.13499	1.33727	0.123027	0.00891093
Prostaglandin E synthase 2	Q8BWM0	S381	0.0444782	0.123061	0.16545	0.222339	0.445664	0.520833	-1.21077	1.31749	0.151209	0.0255239
Actin-binding LIM protein 1	Q8K4G5	S670/1	1.89506	1.63323	1.42235	1.66416	3.01375	4.61818	0.192995	1.30607	0.340861	0.107302
Ryanodine receptor 2	E9Q401	S2367/8	0.00400549	0.00723164	0.00610837	0.00397126	0.0126257	0.0122751	0.15683	1.30475	0.793074	0.0206907
Kinectin	Q61595	T71	3.44882	2.68201	1.01818	5.20588	9.40529	5.73798	-0.0217752	1.28275	0.984516	0.25026
ADP/ATP translocase 2	P51881	S42	0.112898	0.0904271	0.053609	0.0569307	0.138655	0.129927	0.879226	1.2808	0.0550338	0.00347373
Dihydrolipoyllysine-residue acetyltransferase component of pyruvate dehydrogenase complex, mitochondrial	Q8BMF4	S470	0.00264578	0.00172607	0.00220557	0.00296679	0.00638376	0.00618343	-0.24258	1.28077	0.571582	0.0111413
Plakophilin 2	Q9CQ73	S82	4.34932	5.31092	11.6925	6.33554	27.75	15.6083	-0.900114	1.26606	0.264008	0.196516
Hemicentin-2	A2AJ76	S212	0.00324638	0.0172269	0.012439	0.0124242	0.0415232	0.0182353	-0.280274	1.26513	0.783242	0.272752
MICOS complex subunit Mic27	Q78IK4	S204, S210	0.015723	0.0130854	0.0198991	0.0294845	0.0479339	0.0688	-0.777543	1.24112	0.174355	0.0992387
Myosin-6	Q02566	T1853	2.83582e-05	0.000403433	0.000176445	0.000224806	0.000683363	0.000243007	0.105828	1.20708	0.94299	0.357628
Trifunctional enzyme subunit alpha, mitochondrial	Q8BMS1	S316, Y320	0.000858639	0.000600133	0.000423182	0.00100688	0.0017521	0.00153571	0.0286755	1.20105	0.968217	0.0963345
Phosphoglucomutase-1	Q9D0F9	T115/S117	1.56248	2.18086	0.573646	0.668539	1.47056	1.37375	1.59144	1.1952	0.0572463	0.00708325
Citrate synthase, mitochondrial	Q9CZU6	S226	0.0060129	0.00432364	0.00372738	0.0110905	0.0199742	0.0138801	-0.519584	1.192	0.61319	0.184637
Beta-2-syntrophin	Q61235	S211	0.854447	0.633065	0.809091	0.940541	2.30769	1.62687	-0.23415	1.16915	0.415758	0.0876725
Protein phosphatase 1 regulatory subunit 3A	Q99MR9	T820/S821	0.328409	0.7625	0.343646	0.0935294	0.602321	0.380208	1.31925	1.16829	0.321875	0.244599
Caveolae-associated protein 1	O54724	S42	0.0822404	0.0393082	0.0964467	0.0287209	0.169154	0.111285	-0.0423281	1.16383	0.968103	0.223452
PGC-1 and ERR-induced regulator in muscle protein 1	Q149B8	S163	1.38802	3.83871	0.896869	0.549327	2.18615	1.03097	1.85364	1.15351	0.266238	0.279814
Electron transfer flavoprotein subunit alpha, mitochondrial	Q99LC5	S140, T143	0.00200562	0.000852597	0.00108962	0.000678167	0.000954194	0.0029386	0.693172	1.13886	0.467069	0.404411
Alpha-crystallin B chain	P23927	S19/21	0.0305093	0.0259707	0.0172696	0.02	0.030614	0.0511157	0.599739	1.13286	0.0683197	0.16458
Obscurin	A2AAJ9	S2943	0.0101786	0.00585253	0.00631373	0.00516529	0.00763158	0.0168938	0.481875	1.09528	0.416152	0.297019
Elongation factor 1-beta	O70251	S83	0.840183	0.886878	1.02614	1.58301	3.88703	1.68222	-0.595264	1.0939	0.2552	0.322771
Heat shock protein beta-1	P14602	S86/7	9.80952	6.95804	5.88933	8.2	16.8392	13.1818	0.25107	1.09137	0.541449	0.0664686
Very long-chain specific acyl-CoA dehydrogenase, mitochondrial	P50544	S624/5	0.00154094	0.0018198	0.00203735	0.00227891	0.00465152	0.00453988	-0.361004	1.0905	0.122319	0.00296629
Carnitine O-palmitoyltransferase 1, muscle isoform	Q924X2	S330	0.00284018	0.00350538	0.00202756	0.00154918	0.00378261	0.00382353	0.827102	1.08852	0.0775223	0.0139027
Plakophilin 2	Q9CQ73	S564	0.336301	0.395798	0.396333	0.236203	1.025	0.311573	0.210893	1.07932	0.618962	0.437204
Ryanodine receptor 2	E9Q401	S4359	0.0176374	0.0108475	0.00152217	0.00225862	0.00202793	0.00592593	2.91343	1.07297	0.0686536	0.403164
cAMP-dependent protein kinase type I-alpha regulatory subunit	Q9DBC7	T75/S77	1.34051	0.996522	0.913194	1.10748	3.85185	0.396644	0.209844	1.07212	0.507266	0.5857
LIM domain only 7	E9PYF4	S1446/T1447	6.72688	9.87023	7.3754	6.5655	17.0813	12.1635	0.251608	1.06886	0.499173	0.0917084
Spectrin beta chain, non-erythrocytic 1	Q62261	S2163/64, S2168	0.298031	0.868939	0.403049	0.403788	0.723491	0.968477	0.532419	1.06835	0.592639	0.0687956
Striated muscle-specific serine/threonine-protein kinase	Q62407	S2461	0.273973	0.80611	0.431214	0.384155	0.800752	0.874251	0.405617	1.03864	0.669326	0.0101505
MICOS complex subunit Mic60	Q8CAQ8	S113	0.0258427	0.028766	0.065979	0.0891577	0.193258	0.124495	-1.50634	1.03437	0.0499923	0.154314
Striated muscle-specific serine/threonine-protein kinase	Q62407	S2042	0.780822	2.0329	1.32948	1.24813	2.38346	2.89521	0.126446	1.03414	0.868099	0.0348887
NADH dehydrogenase [ubiquinone] 1 alpha subcomplex subunit 13	Q9ERS2	T113	0.0178049	0.0116667	0.0144776	0.02032	0.035969	0.0346903	-0.239666	1.02189	0.593879	0.0267036
Cysteine and glycine-rich protein 3	P50462	S153	0.0279253	0.04	0.0247586	0.046336	0.108095	0.0360877	-0.0657904	1.02009	0.909736	0.433462
26S proteasome non-ATPase regulatory subunit 2	Q8VDM4	T9	0.23431	0.175414	0.147697	0.0849498	0.036789	0.433628	0.816506	1.0158	0.175881	0.613967
LIM domain-binding protein 3	Q9JKS4	T113, S116, T119, S123	0.303698	0.587552	0.416746	0.506856	1.08354	0.762584	-0.0514403	0.999155	0.923413	0.109541
EH domain-containing protein 4	Q9EQP2	S15	0.2776	0.339247	0.193429	0.315871	0.490404	0.517921	0.276398	0.985374	0.514897	0.0578126
Phosphoglucomutase-like protein 5	Q8BZF8	S122	62.117	81.5217	61.3178	160.983	163.23	276.404	-0.630066	0.983794	0.519559	0.286247
MICOS complex subunit Mic19	Q9CRB9	S50/S51	0.00990199	0.0139149	0.0213573	0.042399	0.0613186	0.0639172	-1.42058	0.974008	0.20326	0.101194
Beta-2-syntrophin	Q61235	S75	1.79515	1.39113	2.29091	2.70811	4.28571	5.38806	-0.649773	0.952434	0.0891328	0.0580865
Long-chain specific acyl-CoA dehydrogenase, mitochondrial	P51174	S193	0.00139623	0.00167797	0.00167669	0.00142282	0.00312422	0.00286452	-0.0118329	0.950212	0.952847	0.0154359
Striated muscle-specific serine/threonine-protein kinase	Q62407	S2020	1.92466	3.58402	3.21387	3.15396	5.6391	6.64671	-0.209097	0.948118	0.6564	0.0278809
Heat shock protein 75 kDa, mitochondrial	Q9CQN1	T62	0.336126	0.226816	0.564972	0.430952	1.13341	0.778481	-0.823051	0.940892	0.129309	0.137134
Myosin-binding protein C, cardiac-type	O70468	S455	0.00227845	0.0059447	0.00850356	0.0058022	0.00841365	0.0189286	-0.798833	0.934534	0.313371	0.352749
Electron transfer flavoprotein-ubiquinone oxidoreductase, mitochondrial	Q921G7	S550	0.00353986	0.00382667	0.0139935	0.00975758	0.0169912	0.0283966	-1.68894	0.934311	0.0610599	0.217316
Obscurin	A2AAJ9	S6503	0.405357	0.307834	0.206275	0.111157	0.166316	0.43313	1.16784	0.917183	0.100876	0.424348
LIM domain only 7	E9PYF4	S822	46.7097	55.4198	53.5922	59.0288	129.665	81.9712	-0.141077	0.91011	0.414346	0.175233
Plakophilin 2	Q9CQ73	S102	2.1339	3	4.11142	2.13024	6.80312	4.89466	-0.281875	0.906232	0.659392	0.18578
LIM domain-binding protein 3	Q9JKS4	S129	0.428142	0.528008	0.5786	0.57364	1.20482	0.949528	-0.269133	0.902808	0.188897	0.0592151
Troponin T, cardiac muscle	P50752	S135	0.000234722	0.000247742	0.000354198	0.000290476	0.000527536	0.000673563	-0.41815	0.897712	0.130115	0.073111
Nuclease-sensitive element-binding protein 1	P62960	S172/4	1.73917	4.34733	5.60643	7.02397	16.3639	7.09465	-1.05322	0.893215	0.158312	0.367527
Peptidyl-prolyl cis-trans isomerase FKBP3	Q62446	S34	0.205696	0.525394	0.495575	0.259098	0.556911	0.842105	-0.0458017	0.890489	0.958102	0.22413
NAD(P)H dehydrogenase [quinone] 1	Q64669	S82	0.137941	0.122696	0.179179	0.379899	0.358889	0.677206	-1.10101	0.890034	0.276407	0.332549
Striated muscle-specific serine/threonine-protein kinase	Q62407	S1177	3.44521	6.23972	5.23699	5.5157	10.0376	9.82036	-0.150885	0.885019	0.740372	0.00150271
MICOS complex subunit Mic60	Q8CAQ8	S387	0.0111801	0.018156	0.0388112	0.0599324	0.0992958	0.0830508	-1.75101	0.884924	0.0891798	0.0883303
ATP synthase subunit alpha, mitochondrial	Q03265	S521	0.000198513	0.000207246	0.000228421	0.000243377	0.000418919	0.000451724	-0.217546	0.88391	0.0624113	0.00807256
2-oxoisovalerate dehydrogenase subunit alpha, mitochondrial	P50136	S344	4.13206	5.11149	4.22392	5.08696	10.0456	7.09043	-0.0104705	0.88004	0.963554	0.12615
Catenin beta-1	Q02248	T/S 551/2	8.8342	13.105	12.8736	19.026	21.3333	37.3708	-0.540023	0.879925	0.31494	0.259018
Wolframin	P56695	S32	6.90323	0.773585	0.361516	0.846154	0.654676	1.55184	2.66828	0.869544	0.403111	0.4306
MICOS complex subunit Mic60	Q8CAQ8	T234	0.00195652	0.00175177	0.00169231	0.00245946	0.00382394	0.00375141	-0.16297	0.867588	0.632672	0.0471089
Dihydrolipoyl dehydrogenase, mitochondrial	O08749	S297	0.00306489	0.00415541	0.0292652	0.0314516	0.0523677	0.0582609	-3.07197	0.865556	0.00207945	0.0154924
Alpha-crystallin B chain	P23927	S59	0.522377	0.355806	0.357133	0.384171	0.478158	0.87124	0.244456	0.864179	0.502472	0.262723
LIM domain only 7	E9PYF4	S1539	9.74194	15.6489	11.068	8.83156	24.6411	11.5144	0.351571	0.861484	0.476286	0.346553
Filamin-A	Q8BTM8	S2152	0.0958974	0.0572816	0.130569	0.141266	0.24812	0.2456	-0.827513	0.860962	0.0976272	0.00244448
Spectrin alpha chain, non-erythrocytic 1	P16546	S1291, T1295	0.102137	0.356452	0.186571	0.200998	0.365269	0.337423	0.242749	0.858444	0.806573	0.00975962
Myosin regulatory light chain 2, ventricular/cardiac muscle isoform	P51667	S14/5/9	0.017278	0.0260038	0.0228033	0.0242879	0.0384009	0.0468921	-0.121699	0.856968	0.708854	0.04733
Striated muscle-specific serine/threonine-protein kinase	Q62407	S2413	0.381507	0.871915	0.893642	0.883408	1.59023	1.62275	-0.503612	0.854428	0.397531	0.000563498
Desmoglein-2	O55111	S729	3.42857	3.19588	3.59172	3.46018	6.99029	5.62857	-0.0902104	0.839499	0.250912	0.0554184
Sorbin and SH3 domain-containing protein 2	Q3UTJ2	S1097/8	3.88889	3.35417	5.05096	3.80328	8.93258	6.72021	-0.289769	0.821981	0.357128	0.115824
Xin actin-binding repeat-containing protein 1	O70433	S238	0.0229412	0.0138686	0.0149091	0.015258	0.023183	0.0301402	0.287116	0.821788	0.540503	0.0798126
Mitochondrial import receptor subunit TOM70	Q9CZW5	S94	141.289	168.793	109.239	104.091	180.482	195.202	0.539565	0.816434	0.074423	0.00909959
2,4-dienoyl-CoA reductase, mitochondrial	Q9CQ62	T69	0.000842723	0.000979532	0.000750883	0.00105263	0.00157027	0.00156818	0.0149136	0.799244	0.960036	0.0474859
Histidine rich calcium binding protein, isoform CRA_a	G5E8J6	S376	0.103708	1.13327	0.113303	0.326907	0.481611	0.283784	1.49056	0.798014	0.527711	0.3802
Tropomyosin alpha-1 chain	P58771	S45	0.00135567	0.00133032	0.00125472	0.00145815	0.00223377	0.00248052	-0.014366	0.797221	0.907682	0.0245938
Junction plakoglobin	Q02257	S/T 77/8	0.132308	0.192199	0.121656	0.0135526	0.117016	0.116985	1.26306	0.791329	0.265273	0.457254
PGC-1 and ERR-induced regulator in muscle protein 1	Q149B8	S522, S530	0.616976	1.81774	0.685083	0.483184	1.18506	0.834292	1.05938	0.789526	0.407521	0.170197
Trifunctional enzyme subunit alpha, mitochondrial	Q8BMS1	S615	0.000153141	0.000254642	0.000424545	0.000376147	0.000619328	0.000764286	-0.973445	0.789121	0.073047	0.0623715
Erythrocyte band 7 integral membrane protein	P54116	S161	1.93717	1.95652	1.47951	2.14423	3.01775	3.21854	0.103661	0.78321	0.724095	0.0639424
Tensin 1	E9Q0S6	T1009	4.8318	2.78947	4.16928	3.00415	5.82883	6.4507	0.0873701	0.775521	0.866524	0.0608575
orting and assembly machinery component 50 homolog	Q8BGH2	S269/70	0.0166539	0.0150922	0.0170588	0.0195164	0.0316279	0.0307458	-0.204288	0.770072	0.239085	0.0100888
Tensin 1	E9Q0S6	S545	4.29327	5.18509	4.94671	4.30152	7.71231	8.02864	0.0354602	0.767274	0.853754	0.0120277
Four and a half LIM domains protein 2	O70435	S250	8.79227	40.9868	28.9423	19.1743	51.3189	29.9716	0.0490052	0.756552	0.96508	0.293172
Hepatoma-derived growth factor	P51859	S165	15.8197	13	23.8202	36.1607	27.673	73.6607	-1.05745	0.756538	0.132903	0.476689
Nuclease-sensitive element-binding protein 1	P62960	S163	5.61525	6.70229	6.4745	10.0342	17.4684	10.2881	-0.422516	0.749591	0.377099	0.295598
Tropomyosin alpha-1 chain	P58771	S61	0.00194845	0.00163348	0.00202358	0.00206608	0.00340693	0.00346753	-0.191242	0.749264	0.251243	0.00070574
Fatty acid-binding protein, heart	P11404	S/T 35/7	0.000417972	0.00040804	4.49708e-05	0.000697087	0.000527054	0.000708783	0.154631	0.735884	0.909351	0.541613
Vinculin	Q64727	S721	0.555556	0.510574	0.238007	0.475113	0.504545	0.679231	0.580165	0.731179	0.281069	0.251119
Alpha-actinin-2	Q9JI91	S147	0.00180473	0.0155043	0.0115238	0.00822165	0.0185789	0.0140426	-0.189994	0.724302	0.87865	0.148679
MICOS complex subunit Mic60	Q8CAQ8	S34	0.00508696	0.0125532	0.010979	0.0124324	0.0200704	0.0185311	-0.408352	0.721442	0.527231	0.0188764
PGC-1 and ERR-induced regulator in muscle protein 1	Q149B8	S159	1.72611	2.30968	1.04236	0.639013	1.83766	0.933628	1.26321	0.72092	0.0800369	0.38569
Vinculin	Q64727	S346	0.75	0.779456	0.309963	0.624434	0.661364	0.876923	0.71091	0.719216	0.200247	0.254059
Myosin-7	Q91Z83	S1199	0.0768421	0.243514	0.187772	0.182745	0.303247	0.305306	-0.209865	0.715844	0.791942	0.000520376
Voltage-dependent anion-selective channel protein 2	Q60930	S116	0.00288646	0.00257037	0.00307616	0.00233333	0.0035274	0.00533898	0.0125708	0.712852	0.958569	0.219514
Myosin-6	Q02566	T1284	0.000437811	0.000356223	0.000432548	0.000397287	0.000660107	0.000694056	-0.0636235	0.706505	0.726076	0.0086025
Myoglobin	P04247	S121	0.019376	0.0328725	0.0202434	0.0265413	0.0358041	0.0404728	0.159353	0.70521	0.748903	0.0639557
Sarcalumenin	Q7TQ48	S317	0.0266498	0.0346454	0.0298072	0.0394315	0.0575567	0.0552558	-0.175803	0.704277	0.590464	0.0478986
Plakophilin 2	Q9CQ73	S188	0.153082	0.305462	0.358322	0.257064	0.555	0.444807	-0.424429	0.700159	0.481625	0.123984
Malate dehydrogenase, cytoplasmic	P14152	S241	0.00718543	0.0790251	0.0492693	0.0719626	0.0992754	0.0973958	-0.491834	0.698016	0.687736	0.0802907
Tropomyosin alpha-1 chain	P58771	S87	0.00334021	0.00282685	0.00290252	0.00305286	0.0049899	0.0046176	0.0503881	0.689968	0.73054	0.0118715
Myosin-7	Q91Z83	T1188	0.00273684	0.00346486	0.00454348	0.00498039	0.00727273	0.00804082	-0.618883	0.685188	0.0595446	0.0225113
Troponin T, cardiac muscle	P50752	S80	0.00434028	0.00064	0.00383206	0.0030068	0.00284058	0.00813793	-0.45753	0.682854	0.67247	0.520788
MICOS complex subunit Mic27	Q78IK4	T/S 235/6	0.0313725	0.0663415	0.0461883	0.0684536	0.078719	0.1048	-0.230498	0.678794	0.722593	0.182348
BAG family molecular chaperone regulator 3	Q9JLV1	S117	0.0120922	0.0292233	0.0560479	0.0544882	0.0747232	0.101585	-1.41976	0.673578	0.0565675	0.134421
Apoptosis-inducing factor 1, mitochondrial	Q9Z0X1	S267	0.131594	0.0546207	0.0491156	0.0582836	0.0842857	0.0863636	0.793985	0.668051	0.416258	0.0213831
Cytochrome b-c1 complex subunit 2, mitochondrial	Q9DB77	S25	0.0014491	0.00132546	0.00163342	0.00171206	0.00232497	0.00299007	-0.269953	0.667868	0.0600089	0.0987926
ATP synthase subunit alpha, mitochondrial	Q03265	S76	0.000183643	0.000158696	0.000561404	0.000370861	0.000733108	0.000744828	-1.44531	0.664772	0.0917446	0.103703
ATP synthase subunit gamma, mitochondrial	Q91VR2	S109	0.000874488	0.0118448	0.0154618	0.0090175	0.020403	0.0183724	-0.944543	0.663581	0.452906	0.168611
Fructose-bisphosphate aldolase A	P05064	S36,S39	0.0658351	0.0605948	0.0572917	0.0602564	0.0928095	0.0919463	0.105087	0.652369	0.278134	0.00210427
EH domain-binding protein 1-like protein 1	Q99MS7	S1444	11.1287	9.72872	7.85594	5.19685	10.2409	10.2409	0.676205	0.649983	0.121764	0.107794
Mitochondrial 2-oxoglutarate/malate carrier protein	Q9CR62	T103	0.00362389	0.00154854	0.00257407	0.00196744	0.00298522	0.00411354	0.18767	0.644393	0.797925	0.184021
Sorbin and SH3 domain-containing protein 1	Q62417	S432, T435	0.174432	0.155181	0.184643	0.148533	0.252219	0.267571	-0.0155121	0.641645	0.938545	0.0414789
Myosin-6	Q02566	S1201	0.00726368	0.00966738	0.00739829	0.00903101	0.0125313	0.0130769	0.0434021	0.640337	0.878797	0.0334203
2,4-dienoyl-CoA reductase, mitochondrial	Q9CQ62	T245	0.000321596	0.000482456	0.000441696	0.000496013	0.000681745	0.00077972	-0.221851	0.640203	0.513627	0.04283
Obscurin	A2AAJ9	S236, T242	0.0350376	0.0204464	0.0172811	0.0213922	0.0286777	0.0315526	0.520736	0.639153	0.382944	0.0501184
LIM domain-binding protein 3	Q9JKS4	S238	0.0196721	0.0217293	0.0199797	0.0141463	0.0274312	0.0257075	0.278808	0.63889	0.360556	0.0889147
Cytochrome b-c1 complex subunit 6, mitochondrial	P99028	T61	0.0105357	0.00779365	0.00987179	0.0118978	0.0172297	0.0166393	-0.248158	0.637653	0.419178	0.0290981
Tensin 1	E9Q0S6	S509	6.85015	6.31579	6.9279	7.3029	12.973	9.15493	-0.112206	0.63685	0.244432	0.175776
LIM domain only 7	E9PYF4	S890	1.20645	1.77099	0.871845	0.945372	1.35885	1.46635	0.712344	0.636622	0.178435	0.016287
Myosin-7	Q91Z83	S948	0.00744737	0.0145946	0.0141304	0.0143529	0.0235065	0.0207755	-0.369867	0.6366	0.462761	0.0287871
Histidine rich calcium binding protein, isoform CRA_a	G5E8J6	S565-569	1.83803	2.44053	1.47261	2.2804	3.31896	2.46757	0.189075	0.624646	0.654011	0.225291
Telethonin	O70548	T109	0.575855	0.357746	0.26484	0.450673	0.4085	0.693277	0.383829	0.622783	0.526088	0.373778
Vinculin	Q64727	S579	0.0632716	0.0480363	0.0236162	0.0515837	0.0524242	0.0628462	0.565752	0.616219	0.374502	0.311504
Cytochrome b-c1 complex subunit 2, mitochondrial	Q9DB77	S368	0.00304192	0.00223097	0.0027182	0.0036965	0.0048745	0.00495037	-0.282789	0.615057	0.463713	0.0737502
LIM domain only 7	E9PYF4	S1609	18.5161	25.4198	20.1942	18.5129	31.0526	28.125	0.182806	0.612455	0.538398	0.0261377
Myosin-7	Q91Z83	S1718	0.0331618	0.0774081	0.088587	0.0735882	0.123571	0.123918	-0.552594	0.609816	0.384451	0.0295596
Spectrin beta chain, non-erythrocytic 1	Q62261	T2327	0.190056	0.340404	0.223943	0.14361	0.210819	0.349189	0.529292	0.607494	0.440095	0.352111
Myosin-6	Q02566	T1190	0.000258706	0.000137554	0.000179015	0.000246124	0.000300537	0.000344406	-0.101487	0.601235	0.854134	0.111278
Actin-binding LIM protein 1	Q8K4G5	T586	1	0.689421	0.52803	0.919831	0.65	1.54343	0.222605	0.599268	0.676707	0.524577
Calsequestrin-2	O09161	S36	0.00307732	0.00473333	0.00472283	0.0115748	0.0116292	0.0130387	-1.06115	0.597972	0.351766	0.354093
Myosin-binding protein C, cardiac-type	O70468	S1016	0.0014891	0.00324885	0.00152732	0.00166374	0.00253012	0.00229911	0.570231	0.59776	0.473231	0.0257881
Creatine kinase M-type	P07310	T166	0.00283126	0.00310811	0.00308886	0.00243243	0.00398892	0.00436404	0.105303	0.597281	0.61673	0.0644701
Malate dehydrogenase, mitochondrial	P08249	S246	0.00203352	0.00167683	0.0017875	0.00209615	0.00298171	0.00288889	-0.0658598	0.596092	0.748549	0.0253181
Sarcalumenin	Q7TQ48	Y816	0.00498316	0.00744681	0.00975207	0.0115452	0.0173804	0.0146547	-0.776844	0.588985	0.100583	0.0812281
Histidine rich calcium binding protein, isoform CRA_a	G5E8J6	S517	0.271186	0.356618	0.306422	0.510593	0.782837	0.443561	-0.380049	0.585993	0.48267	0.409833
Myosin-6	Q02566	S1309	0.0028893	0.00341202	0.00291006	0.00361434	0.00504472	0.00473776	-0.0501922	0.584355	0.822984	0.0513572
Apoptosis-inducing factor 1, mitochondrial	Q9Z0X1	S370	0.0350725	0.0137241	0.0146939	0.018209	0.0267143	0.0225325	0.568569	0.581817	0.539035	0.0959171
Aspartate aminotransferase, mitochondrial	P05202	S360	0.00153527	0.00138957	0.00110128	0.00147477	0.0019585	0.00189286	0.183194	0.580201	0.476029	0.0781901
Cytochrome c oxidase subunit 5B, mitochondrial	P19536	S32	0.00307692	0.00297248	0.00283255	0.00255965	0.00392226	0.00406814	0.165917	0.567392	0.153446	0.0138895
Caveolae-associated protein 1	O54724	T34	0.0124317	0.0267296	0.035533	0.0248837	0.0656716	0.0236991	-0.625521	0.564854	0.355441	0.572564
BAG family molecular chaperone regulator 3	Q9JLV1	S179	1.62411	2.5534	1.59281	1.56693	2.04797	2.62324	0.402836	0.563989	0.387856	0.119653
Tropomyosin alpha-1 chain	P58771	T108	0.000685567	0.00058371	0.000816038	0.000947137	0.00148485	0.00112121	-0.474168	0.563696	0.0968519	0.161003
Myomesin 2	Q14BI5	S1446	0.0173797	0.0148058	0.0180601	0.0230233	0.0331844	0.0275121	-0.352143	0.563057	0.252484	0.121371
PGC-1 and ERR-induced regulator in muscle protein 1	Q149B8	S208	0.587732	0.925806	0.425414	0.137892	0.577922	0.253097	1.42593	0.560961	0.165586	0.600041
MICOS complex subunit Mic60	Q8CAQ8	T397	0.00232298	0.00494326	0.00416783	0.00635811	0.0093662	0.00610169	-0.534667	0.555327	0.440572	0.335626
Ryanodine receptor 2	E9Q401	S2030	0.00576923	0.00723164	0.00491626	0.00353448	0.00787709	0.00453968	0.621459	0.555141	0.152127	0.386746
Desmin	P31001	T17, S25, S28	0.0544187	0.0390625	0.0309621	0.024607	0.0280351	0.0532719	0.750392	0.549095	0.150076	0.426916
Cardiac phospholamban	P61014	S/T 16/7	1.81919	1.43894	0.869855	0.478112	1.05629	0.915766	1.27326	0.548916	0.0728692	0.272495
Caveolae-associated protein 1	O54724	S20/1	0.084153	0.0852201	0.0993655	0.109302	0.133209	0.171944	-0.301003	0.548323	0.0590175	0.137274
Solute carrier family 2, facilitated glucose transporter member 4	P14142	S488	6.7323	4.24203	4.96025	5.45036	8.00828	7.21429	0.0760787	0.548158	0.844847	0.0356044
Myosin-6	Q02566	S1720	0.0031347	0.00307307	0.00349036	0.00363663	0.00510644	0.00530769	-0.199218	0.547177	0.0285435	0.00567951
Histidine rich calcium binding protein, isoform CRA_a	G5E8J6	S402	0.204661	0.319853	0.231193	0.237288	0.364273	0.319555	0.162991	0.545644	0.675149	0.0412256
Electron transfer flavoprotein subunit alpha, mitochondrial	Q99LC5	S191	0.00373283	0.0044026	0.0106011	0.011991	0.0140177	0.0189223	-1.47352	0.544024	0.0111983	0.179496
Sarcalumenin	Q7TQ48	S442	0.0305387	0.0450355	0.0396694	0.0542274	0.07733	0.059335	-0.313183	0.541496	0.466585	0.2059
Sodium/potassium-transporting ATPase subunit alpha-1	Q8VDN2	S452	0.00775269	0.00956311	0.0106068	0.0110256	0.0173057	0.0141097	-0.321106	0.53828	0.145841	0.0935686
Sorbin and SH3 domain-containing protein 1	Q62417	T51, S53/54/55/58, S62	0.390473	0.358655	0.322659	0.384859	0.566174	0.45921	0.0824458	0.535325	0.611883	0.123971
Succinate dehydrogenase [ubiquinone] flavoprotein subunit, mitochondrial	Q8K2B3	S530	0.00234584	0.00215805	0.00204582	0.00248819	0.00386243	0.0027027	-0.00961337	0.534037	0.955738	0.243401
Histidine rich calcium binding protein, isoform CRA_a	G5E8J6	S199-01	0.292802	0.457031	0.300743	0.337802	0.53218	0.390982	0.231781	0.531796	0.576561	0.190526
BAG family molecular chaperone regulator 3	Q9JLV1	S372/373, S390	0.48484	0.643447	0.569611	0.570669	0.684871	0.963028	-0.0152541	0.53124	0.946609	0.209564
Sarcalumenin	Q7TQ48	T30	0.00360269	0.00457447	0.00429752	0.00612245	0.0081864	0.00685422	-0.349679	0.529513	0.391377	0.17751
Myosin-6	Q02566	S1338	0.000848259	0.00072103	0.000663812	0.000841085	0.00111628	0.00105245	0.0604462	0.527184	0.795733	0.0719713
Cytochrome b-c1 complex subunit Rieske, mitochondrial	Q9CR68	S157	0.00060479	0.00214706	0.000848238	0.00097644	0.00135427	0.00127411	0.592759	0.526533	0.609926	0.0336175
Sarcalumenin	Q7TQ48	S381	0.00040404	0.0110993	0.00349862	0.00387755	0.00675063	0.00386189	0.641107	0.524823	0.736914	0.382299
Creatine kinase S-type, mitochondrial	Q6P8J7	S319	0.0233386	0.0262516	0.0200179	0.0209679	0.0295662	0.029163	0.274934	0.518955	0.106859	0.00336597
Histidine rich calcium binding protein, isoform CRA_a	G5E8J6	S150	0.38976	0.653554	0.441346	0.574506	0.918973	0.53646	0.038484	0.518759	0.934425	0.391187
NADH dehydrogenase [ubiquinone] 1 alpha subcomplex subunit 9, mitochondrial	Q9DC69	S173	0.00270414	0.00318452	0.00285937	0.00231148	0.00380583	0.00357826	0.187539	0.514018	0.428426	0.0649352
Troponin T, cardiac muscle	P50752	S252	0.00367361	0.00373548	0.00335115	0.00395238	0.00455797	0.00586207	0.0207042	0.512696	0.877425	0.162184
Vinculin	Q64727	S97	0.0737654	0.103927	0.0429889	0.0579186	0.0639394	0.08	0.816353	0.512428	0.150038	0.188715
Protein ABHD11	Q8K4F5	S133	0.0599265	0.221552	0.16391	0.174342	0.274419	0.207453	-0.265075	0.510552	0.759413	0.168213
Cytochrome c oxidase subunit 5A, mitochondrial	P12787	S41	0.0311721	0.0420444	0.0997283	0.0876833	0.128346	0.13836	-1.35597	0.509042	0.0195986	0.0368758
Myosin-7	Q91Z83	T255	0.0117368	0.0827027	0.0733696	0.0643137	0.1	0.0959184	-0.54389	0.508899	0.606978	0.0278831
Ryanodine receptor 2	E9Q401	T1864	0.0154396	0.0116949	0.012266	0.0199425	0.0210615	0.0247619	-0.247316	0.50864	0.612711	0.251218
Myosin-7	Q91Z83	Y1460	0.00355263	0.00643243	0.00717391	0.00505882	0.00787879	0.0095102	-0.292904	0.507427	0.593581	0.193322
Long-chain-fatty-acid--CoA ligase 1	P41216	S233	0.00821839	0.0172396	0.0184133	0.00822878	0.0210506	0.0167528	-0.0655884	0.504808	0.938576	0.418939
Fructose-bisphosphate aldolase A	P05064	S46	0.0173319	0.0128253	0.0152344	0.0158608	0.0233333	0.0206711	-0.0441901	0.500959	0.855748	0.0420706
Myosin light chain 3	P09542	T138	0.000108463	0.000163807	0.000185071	0.00022381	0.0003125	0.000265854	-0.58664	0.500272	0.180512	0.107718
Synaptopodin	Q8CC35	T547	21.8814	29.3296	3.36681	3.76364	1.88022	3.11927	2.84439	-0.512212	0.0274576	0.243101
Striated muscle-specific serine/threonine-protein kinase	Q62407	S337	0.412329	1.09048	0.43237	0.733931	0.22218	0.592814	0.365723	-0.517078	0.6947	0.538726
Tensin 1	E9Q0S6	S836	1.53976	1.40526	1.26646	0.973029	0.575676	0.963732	0.395109	-0.540792	0.16041	0.286779
Synaptopodin	Q8CC35	S833	148.057	150.279	20.3493	29.7273	13.273	21.1009	2.57473	-0.542824	0.00150364	0.327382
C-Jun-amino-terminal kinase-interacting protein 4	Q58A65	S733	0.181524	0.193959	0.0843455	0.0385406	0.0528147	0.0314563	1.61142	-0.544212	0.0335403	0.52467
Nascent polypeptide-associated complex subunit alpha, muscle-specific form	P70670	T/S 946/7, T956	0.937037	0.681529	0.338194	0.285009	0.109669	0.317391	1.37694	-0.545262	0.0623849	0.456889
Tensin 1	E9Q0S6	S1346	4.86239	5.71053	3.16614	2.56846	1.26126	2.66197	0.882606	-0.547652	0.0430416	0.356335
AHNAK nucleoprotein (desmoyokin)	E9Q616	S5099	0.100634	0.0475936	0.0222566	0.0340741	0.0238462	0.0143564	1.39582	-0.56025	0.232884	0.354232
Ryanodine receptor 2	E9Q401	S1317	0.0141758	0.019435	0.012069	0.00867816	0.00586592	0.00820106	0.696016	-0.560599	0.176128	0.246156
Filamin-C	Q8VHX6	S2234/S2237	4.0752	4.14215	2.54183	2.05349	1.28636	1.77772	0.83851	-0.584707	0.0180202	0.157658
Sorbin and SH3 domain-containing protein 2	Q3UTJ2	S109	1.87427	3.10417	2.91083	3.78689	2.3221	2.1419	-0.427976	-0.585332	0.372884	0.129827
Basal cell adhesion molecule	Q9R069	S590	0.408547	0.378676	0.24569	0.384236	0.14092	0.272908	0.321591	-0.606152	0.382637	0.375999
Ankyrin-2	Q8C8R3	S1426	0.861635	1.10769	0.701299	0.414286	0.496396	0.236066	0.819903	-0.606974	0.152471	0.427013
AHNAK nucleoprotein (desmoyokin)	E9Q616	T496	0.026149	0.0269162	0.0157651	0.011837	0.00610256	0.012005	0.942987	-0.60819	0.0238259	0.312424
AHNAK nucleoprotein (desmoyokin)	E9Q616	S5522	0.0822504	0.0388592	0.0361669	0.032	0.0191026	0.0240099	0.829169	-0.660967	0.348481	0.0601308
Caveolae-associated protein 4	A2AMM0	T334	5.08025	4.41989	5.096	3.90977	2.03604	3.64865	0.0770979	-0.66377	0.750653	0.238989
Striated muscle-specific serine/threonine-protein kinase	Q62407	S2288	0.574658	1.28085	0.917919	0.810164	0.43609	0.646707	0.102638	-0.67441	0.874865	0.112235
Microtubule-associated protein 4	P27546	S517	3.43964	2.57047	5.84667	0.906336	3.03153	1.19016	-0.168139	-0.677707	0.895847	0.67853
Caveolae-associated protein 1	O54724	S367	0.0584699	0.081761	0.118274	0.0709302	0.0273632	0.0909091	-0.43214	-0.677833	0.451301	0.465184
AHNAK nucleoprotein (desmoyokin)	E9Q616	S5563, S5567	0.038859	0.0488414	0.0146754	0.0106519	0.00592949	0.00987624	1.79189	-0.680245	0.0285081	0.233209
Nexilin	Q7TPW1	S16	6.60345	6.7	6.05033	10	5.90535	4.10104	-0.270803	-0.681681	0.558809	0.298543
Tensin 1	E9Q0S6	T1015	0.605505	0.489474	0.570533	0.522822	0.25045	0.411972	0.00214101	-0.722938	0.990848	0.124789
Myosin-binding protein C, cardiac-type	O70468	S307	0.985496	1.0673	1.5312	0.756073	0.720689	0.662679	-0.156043	-0.725446	0.791931	0.364866
Nascent polypeptide-associated complex subunit alpha, muscle-specific form	P70670	S1715	0.424074	0.301911	0.172067	0.110582	0.0688742	0.101449	1.36093	-0.730735	0.0834282	0.247814
Protein NDRG2	Q9QYG0	S328/T330, S332/T334/S335, S338, T348/S350, S352/353	0.687497	0.531478	0.60793	0.661192	0.289212	0.468599	-0.0581629	-0.743922	0.78972	0.111901
AHNAK nucleoprotein (desmoyokin)	E9Q616	S5617	0.0113471	0.00655971	0.0193199	0.0102519	0.0121667	0.00507426	-0.723715	-0.778384	0.373221	0.396238
Sorbin and SH3 domain-containing protein 2	Q3UTJ2	S133	0.259064	0.204861	0.192357	0.261475	0.141011	0.121419	0.0317343	-0.790225	0.919014	0.116727
Microtubule-associated protein 4	P27546	T243	1.13667	1.5302	2.20667	0.436639	0.95045	0.570492	0.0128072	-0.797378	0.990809	0.598501
Synaptopodin	Q8CC35	S854	5.46012	22.8771	2.25764	2.08182	0.476323	2.00306	2.70711	-0.807535	0.302183	0.34978
Myomesin-1	Q62234	S857, S863	0.207874	0.0738393	0.0332051	0.021376	0.015047	0.0151907	2.36775	-0.852054	0.233464	0.175865
Desmoplakin	E9Q557	S22	0.855721	9.40828	4.08962	2.08609	1.45225	1.91118	0.732916	-0.876672	0.687393	0.304675
Clathrin heavy chain 1	Q68FD5	T306, T312	0.00159063	0.602094	0.00274194	0.237991	0.00520231	0.124625	1.32636	-0.890845	0.630262	0.71507
Nascent polypeptide-associated complex subunit alpha, muscle-specific form	P70670	S257	10.1574	6.56369	4.40028	2.91032	1.47142	2.45761	1.19361	-0.895815	0.136713	0.198944
Striated muscle-specific serine/threonine-protein kinase	Q62407	S2207	0.3	0.508813	0.299422	0.192825	0.0620301	0.201198	0.716424	-0.903071	0.309436	0.321438
Obscurin	A2AAJ9	S/T 5741/3	0.226692	0.156027	0.106221	0.0710588	0.0351446	0.0587895	1.11025	-0.916309	0.121326	0.188075
ATP synthase subunit alpha, mitochondrial	Q03265	T/S 64/5	9.03346e-05	0.000174638	0.000139649	0.000262914	3.88514e-05	0.000174138	-0.603373	-0.918434	0.454132	0.409114
AHNAK nucleoprotein (desmoyokin)	E9Q616	S136	0.237718	0.327986	0.13694	0.146519	0.0548718	0.0945545	0.99691	-0.923703	0.0897324	0.0815742
Caveolae-associated protein 4	A2AMM0	S296	0.703704	0.322652	0.2528	0.116541	0.0990991	0.0940748	1.4745	-0.935054	0.245957	0.325511
AHNAK nucleoprotein (desmoyokin)	E9Q616	S5607	0.0760697	0.154545	0.0585781	0.0844444	0.0329487	0.0415842	0.689245	-0.940293	0.400212	0.128641
Synaptopodin	Q8CC35	S765	32.5153	47.6257	6.70306	8.49091	3.18663	4.69304	2.39904	-0.947291	0.0507452	0.0887714
Isocitrate dehydrogenase [NADP], mitochondrial	P54071	T350	0.0132071	0.0272575	0.0175603	0.0121246	0.00731903	0.00789082	0.446928	-0.964726	0.54854	0.117889
Desmoplakin	E9Q557	S2221	1.75622	2.04734	1.26415	0.549669	0.328652	0.592105	1.06832	-0.978139	0.123177	0.361666
Tensin 1	E9Q0S6	S1331	9.66361	10.2368	8.87147	6.05809	2.72973	4.76056	0.414629	-0.995078	0.225538	0.165241
AHNAK nucleoprotein (desmoyokin)	E9Q616	S94	0.114897	0.175579	0.131685	0.100148	0.0528205	0.0632426	0.325336	-0.998176	0.481515	0.0733669
Synaptopodin	Q8CC35	S506	29.6524	37.1508	7.59825	5.81818	2.99443	3.66972	2.31592	-1.00951	0.02021	0.071123
Gap junction alpha-1 protein	P23242	S306	0.11528	0.158088	0.130909	0.0657895	0.0596073	0.037397	0.474857	-1.01987	0.42893	0.28436
Nascent polypeptide-associated complex subunit alpha, muscle-specific form	P70670	S1285	0.526852	0.770701	0.2	0.222222	0.0565563	0.148551	1.61972	-1.04163	0.0701201	0.148749
Microtubule-associated protein 4	P27546	T759	0.105695	0.222483	0.364	0.0497245	0.134234	0.0662295	-0.334192	-1.04533	0.822445	0.5754
Junction plakoglobin	Q02257	S182	1.83077	1.49645	1.7707	1.20395	1.28237	0.143982	0.1616	-1.06039	0.645695	0.347556
Protein phosphatase 1 regulatory subunit 3A	Q99MR9	S48	5.87121	10.0625	7.01657	4.37059	3.35443	2.09375	0.484674	-1.06356	0.455834	0.179973
Sodium/calcium exchanger 1	P70414	S389	0.39628	0.298026	0.424923	0.189423	0.132743	0.160714	0.176521	-1.0659	0.783672	0.308685
Desmoplakin	E9Q557	S2860	0.617164	0.808876	0.563443	0.297185	0.165028	0.24523	0.728551	-1.06886	0.226974	0.246747
Tensin 1	E9Q0S6	S1423	12.6911	10.4211	10.1881	7.17842	2.91892	5.25352	0.412346	-1.08747	0.266954	0.137184
Proline-rich basic protein 1	A0A087WR45	S259, S265,S268	0.244161	1.13793	0.38756	0.253311	0.145205	0.134708	1.10875	-1.19505	0.498338	0.115545
Sorbin and SH3 domain-containing protein 2	Q3UTJ2	S251	2.24561	4.61806	1.49682	2.63115	0.885768	0.891566	0.73355	-1.21572	0.40744	0.174019
Myosin-binding protein C, cardiac-type	O70468	S72	0.0409201	0.0262673	0.0285036	0.0166813	0.00937751	0.0100446	0.57235	-1.21814	0.362996	0.161556
Plectin	Q9QXS1	S4649	0.563833	0.633715	1.21333	0.399095	0.399533	0.281081	-0.429151	-1.24433	0.662136	0.374932
Nascent polypeptide-associated complex subunit alpha, muscle-specific form	P70670	T1395/8	0.354321	0.311677	0.227933	0.120811	0.0703532	0.0757005	0.933349	-1.25567	0.110594	0.199363
Tensin 1	E9Q0S6	S1363	1.71407	1.46579	1.10658	0.711618	0.218018	0.531338	0.80645	-1.27879	0.100072	0.168098
Myoglobin	P04247	T75	0.00131034	0.000831304	0.00157303	0.00171089	0.000392891	0.000957447	-0.616699	-1.2821	0.149015	0.0796839
Synaptopodin	Q8CC35	S258	10.9202	19.8883	3.31004	4.48182	0.775766	2.4159	1.98329	-1.28766	0.125899	0.149976
Gap junction alpha-1 protein	P23242	S/T 273/5	1.18199	2.31801	0.837727	0.819298	0.127994	0.550165	1.07876	-1.2889	0.246247	0.14649
Microtubule-associated protein 4	P27546	S1046	1.66515	2.13758	3.62	0.62259	1.21171	0.518033	-0.157909	-1.29439	0.898035	0.499883
Pyruvate dehydrogenase E1 component subunit alpha, somatic form, mitochondrial	P35486	S331	0.00204388	0.00308357	0.00557423	0.00509434	0.00262	0.00172243	-1.05705	-1.29679	0.0401519	0.0249215
Nascent polypeptide-associated complex subunit alpha, muscle-specific form	P70670	S442	3.64815	1.92994	1.28492	0.477249	0.127152	0.586957	1.66242	-1.30313	0.182164	0.376545
Microtubule-associated protein 4	P27546	S617	0.243736	0.365772	0.866667	0.173554	0.254054	0.162459	-0.771173	-1.32046	0.602842	0.466469
Myosin-6	Q02566	S1478	7.28856e-05	0.000435622	8.88651e-05	0.000616279	0.000121825	0.000151923	-0.471648	-1.36507	0.787734	0.499944
Pyruvate dehydrogenase E1 component subunit alpha, somatic form, mitochondrial	P35486	S300	0.00103926	0.0015072	0.0017619	0.00163208	0.00076	0.000547529	-0.414482	-1.37614	0.223063	0.0139449
Plectin	Q9QXS1	T4037	0.103915	0.103868	0.32875	0.0826923	0.0739496	0.0828482	-0.985611	-1.39178	0.494886	0.409702
Sorbin and SH3 domain-containing protein 2	Q3UTJ2	S38	0.415205	0.480556	0.421019	0.342623	0.105431	0.180723	0.230216	-1.41611	0.324807	0.0481116
Plectin	Q9QXS1	S728	0.0530201	0.0492837	0.0865	0.0303167	0.0221849	0.0214137	-0.191387	-1.42189	0.8207	0.32238
cAMP-dependent protein kinase catalytic subunit alpha	P05132	S339	0.595642	0.259494	0.344086	0.0656294	0.0765385	0.0758559	1.06153	-1.42681	0.414866	0.452992
Plectin	Q9QXS1	S4391/S4393	0.136532	0.134011	0.258475	0.115011	0.0793277	0.05921	-0.465193	-1.43078	0.547581	0.246301
HECT domain E3 ubiquitin protein ligase 4	E9Q2E4	T2503	0.440559	0.278523	11.0638	2.03302	2.72879	2.08163	-4.18692	-1.44499	0.304106	0.456687
Plectin	Q9QXS1	S1443	0.0389262	0.0363897	0.03375	0.0170588	0.00330532	0.0148857	0.567875	-1.48186	0.28373	0.249584
Desmoplakin	E9Q557	S2620	0.5801	0.555917	0.439623	0.184603	0.0688202	0.145888	0.863845	-1.53969	0.183789	0.264074
Nascent polypeptide-associated complex subunit alpha, muscle-specific form	P70670	S765	2.76852	2.66879	1.02793	1.21693	0.0821192	0.642029	1.27626	-1.63227	0.00445083	0.123622
Tensin 1	E9Q0S6	S1375, S1397	2.52446	2.39868	1.5768	1.22614	0.254054	0.642254	0.812639	-1.64488	0.0295134	0.0677221
AHNAK nucleoprotein (desmoyokin)	E9Q616	S893	0.0412044	0.0338681	0.0261206	0.013363	0.00421795	0.00811881	0.927035	-1.67829	0.136772	0.178837
Microtubule-associated protein 4	P27546	T652, T657, S667	1.17616	1.49664	1.67556	0.268136	0.394294	0.210383	0.459554	-1.68456	0.663639	0.445069
Nascent polypeptide-associated complex subunit alpha, muscle-specific form	P70670	T1484/5, S1492	1.36852	1.21677	0.602793	0.414286	0.106402	0.209928	1.3459	-1.68493	0.0229944	0.082678
Nascent polypeptide-associated complex subunit alpha, muscle-specific form	P70670	T821	1.10401	0.961996	0.343203	0.361376	0.0346799	0.179469	1.55201	-1.71815	0.0108795	0.0782784
Proline-rich basic protein 1	A0A087WR45	S234	6.66667	19.2241	4.52153	2.08609	0.615068	1.35739	1.97024	-1.74414	0.270687	0.210279
Monocarboxylate transporter 1	P53986	S210, S213	0.113372	1.6255	0.185027	1.34351	0.364583	0.0911565	0.185998	-1.74587	0.92216	0.462565
Nexilin	Q7TPW1	S296	2.4556	2.767	2.09081	3.95309	0.855967	0.895245	-0.21071	-1.78713	0.706016	0.147686
Nascent polypeptide-associated complex subunit alpha, muscle-specific form	P70670	S1177	0.809259	0.482166	0.231844	0.342328	0.0464238	0.119565	1.16941	-1.79039	0.173354	0.0911891
Proline-rich basic protein 1	A0A087WR45	S576	1.8397	6.75	1.14593	0.471026	0.143836	0.321478	2.40932	-1.79701	0.294754	0.240693
Nebulin-related-anchoring protein	Q80XB4	S275	1.67898	1.42149	1.91489	0.704545	0.389778	0.332547	0.243227	-1.85854	0.734958	0.257913
Nesprin-1	Q6ZWR6	S8363	0.296512	0.354767	0.353881	0.189744	0.0248	0.12275	0.260664	-1.88141	0.599518	0.17403
Myosin-binding protein C, cardiac-type	O70468	T/S 272/3	0.0074092	0.0230184	0.014228	0.00586813	0.00345382	0.00195536	0.598462	-1.89344	0.618609	0.2259
Pyruvate dehydrogenase E1 component subunit alpha, somatic form, mitochondrial	P35486	S15	0.0117321	0.0104899	0.0201681	0.00851415	0.00238	0.00509506	-0.368167	-1.94	0.636842	0.218354
Microtubule-associated protein 4	P27546	T511	0.207062	0.239597	0.466667	0.0738292	0.0914414	0.0285246	-0.27511	-2.17166	0.834005	0.40132
BAG family molecular chaperone regulator 3	Q9JLV1	S270	0.755319	1.15049	0.694611	1.02362	0.117712	0.230634	0.149475	-2.30233	0.750236	0.0588447
Nesprin-1	Q6ZWR6	S8308	0.415698	0.935698	0.881279	0.463248	0.134857	0.13325	0.00735254	-2.32622	0.99272	0.123495
Pyruvate dehydrogenase E1 component subunit alpha, somatic form, mitochondrial	P35486	S293	0.0850023	0.221867	0.227515	0.0881633	0.0269955	0.0315109	-0.0408308	-2.43179	0.968126	0.20641
Microtubule-associated protein 4	P27546	S590	0.667426	1.1745	2.74667	0.429752	0.163964	0.386885	-0.786189	-2.52767	0.630322	0.376439
Ubiquitin carboxyl-terminal hydrolase 5	P56399	T623	2.24603	1.5084	21.0569	1.18041	0.952	2.77857	-2.56632	-2.57551	0.450861	0.451714
Pyruvate dehydrogenase E1 component subunit alpha, somatic form, mitochondrial	P35486	S232	0.314088	0.997118	2.80112	1.24292	0.232	0.205323	-1.6249	-3.20903	0.249441	0.146701
Acyl-CoA dehydrogenase family member 9, mitochondrial	Q8JZN5	T482	1.7027	0.936416	1.08434	0.417553	0.0947368	0.0613953	0.813277	-3.26594	0.379303	0.181375
Proline-rich basic protein 1	A0A087WR45	T449/S451	3.69427	12.5	2.79904	0.273179	0.0742466	0.141409	2.39813	-3.83248	0.288388	0.375589
Dystrophin	P11531	S3476	0.0335227	0.0401662	1.04633	0.0125895	0.00675481	0.006875	-3.845	-6.27969	0.441148	0.418373
Dystrophin	P11531	S2070	0.00877841	0.00584488	0.131274	0.00215427	0.000204808	0.00148698	-3.18973	-6.30137	0.454746	0.414947
Dystrophin	P11531	T2661	0.00965909	0.0113019	0.517375	0.00589532	0.00264423	0.00393229	-4.64177	-6.31409	0.429615	0.418747
Dystrophin	P11531	S3616/7	0.0196307	0.0170222	1.49807	0.0125482	0.00706731	0.0097526	-5.36507	-6.48882	0.425656	0.420512
Dystrophin	P11531	S3417	0.0463068	0.0722992	3.01158	0.0228926	0.0102885	0.00898437	-4.6772	-7.29873	0.432157	0.41925
Dystrophin	P11531	T3603	0.010767	0.00875346	0.23166	0.00228926	0.000257212	0.000393229	-3.58313	-8.49056	0.448566	0.416114

## Sheet: dCas9 co-prec. proteins
UNIPROT							Summary
Description	Uniprot	Gene ontology (biological process)	Gene ontology (molecular function)	Subcellular location [CC]	Gene name	Mouse	Subcellular localization	Biological Categories
nuclear receptor corepressor 2	Q9WU42	cell proliferation in forebrain [GO:0021846]; forebrain development [GO:0030900]; glucose homeostasis [GO:0042593]; heart morphogenesis [GO:0003007]; in utero embryonic development [GO:0001701]; negative regulation of androgen receptor signaling pathway [GO:0060766]; negative regulation of fat cell differentiation [GO:0045599]; negative regulation of production of miRNAs involved in gene silencin…	chromatin binding [GO:0003682]; DNA binding [GO:0003677]; glucocorticoid receptor binding [GO:0035259]; histone deacetylase binding [GO:0042826]; Notch binding [GO:0005112]; nuclear hormone receptor binding [GO:0035257]; nuclear receptor binding [GO:0016922]; protein-containing complex binding [GO:0044877]; protein N-terminus binding [GO:0047485]; retinoic acid receptor binding [GO:0042974]; reti…	Nucleus.	Ncor2	CTR	Nucleus	Regulation of gene expression
histone H2A.V	Q3THW5	chromatin organization [GO:0006325]	DNA binding [GO:0003677]; protein heterodimerization activity [GO:0046982]	Nucleus {ECO:0000250}. Chromosome {ECO:0000250}.	H2afv	CTR	Nucleus	Regulation of gene expression
glutamine-rich protein 2	Q3V2A7	cell projection assembly [GO:0030031]; flagellated sperm motility [GO:0030317]; negative regulation of ubiquitin-dependent protein catabolic process [GO:2000059]	N/D	Nucleus membrane {ECO:0000269|PubMed:30683861}. Nucleus {ECO:0000269|PubMed:30683861}. Cytoplasm {ECO:0000269|PubMed:30683861}. Cell projection, cilium, flagellum {ECO:0000269|PubMed:30683861}. Note=Localization varies during spermatozoa development. The protein is distributed in the nuclear membrane of the spermatogonia, in the nucleus of round spermatids, in the nucleus and cytoplasm of early e…	Qrich2	CTR	Nucleus	Other
nucleolar pre-ribosomal-associated protein 1	Q571H0	maturation of 5.8S rRNA from tricistronic rRNA transcript (SSU-rRNA, 5.8S rRNA, LSU-rRNA) [GO:0000466]; maturation of LSU-rRNA from tricistronic rRNA transcript (SSU-rRNA, 5.8S rRNA, LSU-rRNA) [GO:0000463]	N/D	Nucleus, nucleolus {ECO:0000250}.	Urb1	CTR	Nucleus	Other
zinc finger CCCH domain-containing protein 18	Q0P678		metal ion binding [GO:0046872]	Nucleus {ECO:0000250}.	Zc3h18	CTR	Nucleus	Metal ion binding
sentrin-specific protease 2	Q91ZX6	dorsal/ventral axis specification [GO:0009950]; fat cell differentiation [GO:0045444]; heart development [GO:0007507]; labyrinthine layer development [GO:0060711]; mRNA transport [GO:0051028]; negative regulation of chromatin binding [GO:0035562]; negative regulation of DNA damage response, signal transduction by p53 class mediator [GO:0043518]; negative regulation of protein binding [GO:0032091]…	protein domain specific binding [GO:0019904]; SUMO-specific endopeptidase activity [GO:0070139]; SUMO-specific isopeptidase activity [GO:0070140]	[Isoform 1]: Nucleus, nuclear pore complex {ECO:0000250|UniProtKB:Q9HC62}. Nucleus membrane {ECO:0000250|UniProtKB:Q9HC62}; Peripheral membrane protein {ECO:0000250|UniProtKB:Q9HC62}; Nucleoplasmic side {ECO:0000250|UniProtKB:Q9HC62}. Note=Shuttles between cytoplasm and nucleus. {ECO:0000250|UniProtKB:Q9HC62}.; [Isoform 2]: Cytoplasm. Cytoplasmic vesicle. Note=Found in the cytoplasm and in cytopl…	Senp2	T2D	Nucleus	Structural/contractile
histone-lysine N-methyltransferase ASH1L	Q99MY8	decidualization [GO:0046697]; flagellated sperm motility [GO:0030317]; histone H3-K36 dimethylation [GO:0097676]; histone H3-K4 methylation [GO:0051568]; interleukin-6 production [GO:0032635]; negative regulation of acute inflammatory response [GO:0002674]; negative regulation of I-kappaB kinase/NF-kappaB signaling [GO:0043124]; negative regulation of inflammatory response [GO:0050728]; negative …	chromatin binding [GO:0003682]; DNA binding [GO:0003677]; histone methyltransferase activity (H3-K36 specific) [GO:0046975]; histone methyltransferase activity (H3-K4 specific) [GO:0042800]; histone methyltransferase activity (H3-K9 specific) [GO:0046974]; metal ion binding [GO:0046872]	Nucleus {ECO:0000250|UniProtKB:Q9NR48}. Cell junction, tight junction {ECO:0000250|UniProtKB:Q9NR48}. Chromosome {ECO:0000250|UniProtKB:Q9NR48}. Note=The relevance of tight junction localization is however unclear. {ECO:0000250|UniProtKB:Q9NR48}.	Ash1l	T2D	Nucleus	Regulation of gene expression
DNA-directed RNA polymerase III subunit RPC2	P59470	defense response to virus [GO:0051607]; innate immune response [GO:0045087]; positive regulation of innate immune response [GO:0045089]; positive regulation of interferon-beta production [GO:0032728]; transcription by RNA polymerase III [GO:0006383]	DNA binding [GO:0003677]; DNA-directed 5'-3' RNA polymerase activity [GO:0003899]; metal ion binding [GO:0046872]; ribonucleoside binding [GO:0032549]	Nucleus {ECO:0000250}.	Pol3b	T2D	Nucleus	Regulation of gene expression
transducin-like enhancer protein 2	Q9WVB2	negative regulation of canonical Wnt signaling pathway [GO:0090090]; negative regulation of transcription, DNA-templated [GO:0045892]; Wnt signaling pathway [GO:0016055]	repressing transcription factor binding [GO:0070491]; transcription corepressor activity [GO:0003714]	Nucleus.	Tle2	T2D	Nucleus	Regulation of gene expression
DNA oxidative demethylase ALKBH2	Q6P6J4	DNA dealkylation involved in DNA repair [GO:0006307]; nucleic acid phosphodiester bond hydrolysis [GO:0090305]; oxidative DNA demethylation [GO:0035511]	1-ethyladenine demethylase activity [GO:0103053]; 2-oxoglutarate-dependent dioxygenase activity [GO:0016706]; cytosine C-5 DNA demethylase activity [GO:0051747]; DNA-N1-methyladenine dioxygenase activity [GO:0043734]; ferrous iron binding [GO:0008198]	Nucleus {ECO:0000269|PubMed:16642038, ECO:0000269|PubMed:18519673}.	Alkbh2	T2D	Nucleus	Other
stress-70 protein	P38647	cellular response to heat [GO:0034605]; cellular response to unfolded protein [GO:0034620]; chaperone cofactor-dependent protein refolding [GO:0051085]; erythrocyte differentiation [GO:0030218]; iron-sulfur cluster assembly [GO:0016226]; negative regulation of cell death [GO:0060548]; negative regulation of erythrocyte differentiation [GO:0045647]; negative regulation of hematopoietic stem cell d…	ATPase activity [GO:0016887]; ATPase activity, coupled [GO:0042623]; ATP binding [GO:0005524]; chaperone binding [GO:0051087]; enzyme binding [GO:0019899]; fibroblast growth factor binding [GO:0017134]; heat shock protein binding [GO:0031072]; misfolded protein binding [GO:0051787]; protein folding chaperone [GO:0044183]; ubiquitin protein ligase binding [GO:0031625]; unfolded protein binding [GO…	Mitochondrion {ECO:0000269|PubMed:7865888}. Nucleus, nucleolus {ECO:0000250|UniProtKB:P38646}.	Hspa9	CTR/T2D	Mitochondrion	Chaperone/protein folding
MICOS complex subunit Mic60	Q8CAQ8	cristae formation [GO:0042407]; mitochondrial calcium ion homeostasis [GO:0051560]; mitochondrion morphogenesis [GO:0070584]	N/D	Mitochondrion inner membrane {ECO:0000250|UniProtKB:Q16891}; Single-pass membrane protein {ECO:0000255}. Mitochondrion {ECO:0000250|UniProtKB:Q16891}.	Immt	CTR	Mitochondrion	Other
ATP synthase subunit delta	Q9DCX2	ATP metabolic process [GO:0046034]; ATP synthesis coupled proton transport [GO:0015986]; cellular response to peptide [GO:1901653]	ATPase activity [GO:0016887]; protein-containing complex binding [GO:0044877]; proton transmembrane transporter activity [GO:0015078]	Mitochondrion. Mitochondrion inner membrane.	Atp5pd	CTR	Mitochondrion	Mitochondrial respiration
cytochrome c oxidase subunit 7A1	P56392	mitochondrial respirasome assembly [GO:0097250]; regulation of oxidative phosphorylation [GO:0002082]	cytochrome-c oxidase activity [GO:0004129]	Mitochondrion inner membrane.	Cox7a1	CTR	Mitochondrion	Mitochondrial respiration
cytochrome c oxidase subunit 5B	P19536	mitochondrial ATP synthesis coupled proton transport [GO:0042776]; mitochondrial electron transport, cytochrome c to oxygen [GO:0006123]	cytochrome-c oxidase activity [GO:0004129]; metal ion binding [GO:0046872]	Mitochondrion inner membrane.	Cox5b	CTR	Mitochondrion	Mitochondrial respiration
NADH dehydrogenase [ubiquinone] 1 beta subcomplex subunit 4	Q9CQC7	mitochondrial respiratory chain complex I assembly [GO:0032981]; response to oxidative stress [GO:0006979]	NADH dehydrogenase (ubiquinone) activity [GO:0008137]	Mitochondrion inner membrane {ECO:0000250|UniProtKB:O95168}; Single-pass membrane protein {ECO:0000255}; Matrix side {ECO:0000250|UniProtKB:O95168}.	Ndufb4	CTR	Mitochondrion	Mitochondrial respiration
peroxiredoxin-5	P99029	cell redox homeostasis [GO:0045454]; cellular response to oxidative stress [GO:0034599]; cellular response to reactive oxygen species [GO:0034614]; hydrogen peroxide catabolic process [GO:0042744]; NADPH oxidation [GO:0070995]; negative regulation of apoptotic process [GO:0043066]; negative regulation of oxidoreductase activity [GO:0051354]; negative regulation of transcription by RNA polymerase …	antioxidant activity [GO:0016209]; cysteine-type endopeptidase inhibitor activity involved in apoptotic process [GO:0043027]; peroxidase activity [GO:0004601]; peroxiredoxin activity [GO:0051920]; peroxynitrite reductase activity [GO:0072541]; protein dimerization activity [GO:0046983]; RNA polymerase III regulatory region DNA binding [GO:0001016]; signaling receptor binding [GO:0005102]; thiored…	[Isoform Mitochondrial]: Mitochondrion {ECO:0000250|UniProtKB:P30044}.; [Isoform Cytoplasmic+peroxisomal]: Cytoplasm {ECO:0000250|UniProtKB:P30044}. Peroxisome matrix {ECO:0000250|UniProtKB:P30044}.	Prdx5	CTR	Mitochondrion	Cell redox homeostasis
creatine kinase S-type	Q6P8J7	phosphocreatine biosynthetic process [GO:0046314]; phosphocreatine metabolic process [GO:0006603]	ATP binding [GO:0005524]; cardiolipin binding [GO:1901612]; creatine kinase activity [GO:0004111]; kinase activity [GO:0016301]	Mitochondrion inner membrane {ECO:0000250}; Peripheral membrane protein {ECO:0000250}; Intermembrane side {ECO:0000250}.	Ckmt2	T2D	Mitochondrion	Other
succinyl-CoA ligase [ADP-forming] subunit beta	Q9Z2I9	succinate metabolic process [GO:0006105]; succinyl-CoA metabolic process [GO:0006104]; tricarboxylic acid cycle [GO:0006099]	ATP binding [GO:0005524]; magnesium ion binding [GO:0000287]; succinate-CoA ligase (ADP-forming) activity [GO:0004775]; succinate-CoA ligase activity [GO:0004774]	Mitochondrion {ECO:0000255|HAMAP-Rule:MF_03220}.	Sucla2	T2D	Mitochondrion	Mitochondrial respiration
ATP synthase-coupling factor 6	P97450	ATP metabolic process [GO:0046034]; ATP synthesis coupled proton transport [GO:0015986]; negative regulation of arachidonic acid secretion [GO:1900139]; negative regulation of prostaglandin secretion [GO:0032307]; positive regulation of blood pressure [GO:0045777]; positive regulation of heart rate [GO:0010460]; response to muscle activity [GO:0014850]	ATPase activity [GO:0016887]; protein-containing complex binding [GO:0044877]; proton transmembrane transporter activity [GO:0015078]	Mitochondrion. Mitochondrion inner membrane.	Atp5pf	T2D	Mitochondrion	Mitochondrial respiration
ATP synthase subunit epsilon	P56382	ATP synthesis coupled proton transport [GO:0015986]	ATPase activity [GO:0016887]; proton-exporting ATPase activity, phosphorylative mechanism [GO:0008553]; proton-transporting ATP synthase activity, rotational mechanism [GO:0046933]	Mitochondrion. Mitochondrion inner membrane.	Atp5f1e	T2D	Mitochondrion	Mitochondrial respiration
2-oxoglutarate dehydrogenase	Q60597	2-oxoglutarate metabolic process [GO:0006103]; cerebellar cortex development [GO:0021695]; generation of precursor metabolites and energy [GO:0006091]; glycolytic process [GO:0006096]; hippocampus development [GO:0021766]; histone succinylation [GO:0106077]; NADH metabolic process [GO:0006734]; olfactory bulb mitral cell layer development [GO:0061034]; pyramidal neuron development [GO:0021860]; s…	chaperone binding [GO:0051087]; heat shock protein binding [GO:0031072]; metal ion binding [GO:0046872]; oxoglutarate dehydrogenase (NAD+) activity [GO:0034602]; oxoglutarate dehydrogenase (succinyl-transferring) activity [GO:0004591]; thiamine pyrophosphate binding [GO:0030976]	Mitochondrion matrix {ECO:0000250|UniProtKB:Q02218}. Nucleus {ECO:0000250|UniProtKB:Q02218}. Note=Mainly localizes in the mitochondrion. A small fraction localizes to the nucleus, where the 2-oxoglutarate dehydrogenase complex is required for histone succinylation. {ECO:0000250|UniProtKB:Q02218}.	Ogdh	T2D	Mitochondrion	Mitochondrial respiration
cytochrome c oxidase subunit II	P00405	ATP synthesis coupled electron transport [GO:0042773]; lactation [GO:0007595]; positive regulation of ATP biosynthetic process [GO:2001171]; positive regulation of hydrogen peroxide biosynthetic process [GO:0010729]; positive regulation of necrotic cell death [GO:0010940]; response to cold [GO:0009409]	copper ion binding [GO:0005507]; cytochrome-c oxidase activity [GO:0004129]	Mitochondrion inner membrane; Multi-pass membrane protein.	Mtco2	T2D	Mitochondrion	Mitochondrial respiration
succinate dehydrogenase [ubiquinone] flavoprotein subunit	Q8K2B3	mitochondrial electron transport, succinate to ubiquinone [GO:0006121]; nervous system development [GO:0007399]; oxidation-reduction process [GO:0055114]; respiratory electron transport chain [GO:0022904]; succinate metabolic process [GO:0006105]; tricarboxylic acid cycle [GO:0006099]	electron transfer activity [GO:0009055]; flavin adenine dinucleotide binding [GO:0050660]; succinate dehydrogenase (ubiquinone) activity [GO:0008177]; succinate dehydrogenase activity [GO:0000104]	Mitochondrion inner membrane {ECO:0000250|UniProtKB:Q0QF01}; Peripheral membrane protein {ECO:0000250|UniProtKB:Q0QF01}; Matrix side {ECO:0000250|UniProtKB:Q0QF01}.	Sdha	T2D	Mitochondrion	Mitochondrial respiration
NADH dehydrogenase [ubiquinone] 1 alpha subcomplex assembly factor 5	Q59J78	cellular respiration [GO:0045333]; negative regulation of insulin secretion involved in cellular response to glucose stimulus [GO:0061179]; reactive oxygen species metabolic process [GO:0072593]; respiratory electron transport chain [GO:0022904]	electron transfer activity [GO:0009055]; NADH dehydrogenase (ubiquinone) activity [GO:0008137]	Mitochondrion {ECO:0000250|UniProtKB:Q8N183}.	Ndufaf2	T2D	Mitochondrion	Mitochondrial respiration
NADH dehydrogenase [ubiquinone] iron-sulfur protein 3	Q9DCT2	negative regulation of cell growth [GO:0030308]; negative regulation of intrinsic apoptotic signaling pathway [GO:2001243]; reactive oxygen species metabolic process [GO:0072593]	NADH dehydrogenase (ubiquinone) activity [GO:0008137]; NADH dehydrogenase activity [GO:0003954]	Mitochondrion inner membrane {ECO:0000250}. Note=Matrix and cytoplasmic side of the mitochondrial inner membrane. {ECO:0000250}.	Ndufs3	T2D	Mitochondrion	Mitochondrial respiration
NADH dehydrogenase [ubiquinone] 1 alpha subcomplex subunit 9	Q9DC69	circadian rhythm [GO:0007623]; mitochondrial respiratory chain complex I assembly [GO:0032981]; response to glucose [GO:0009749]; ubiquinone-6 biosynthetic process [GO:1901006]	NADH dehydrogenase activity [GO:0003954]; protein-containing complex binding [GO:0044877]	Mitochondrion matrix {ECO:0000250|UniProtKB:Q16795}.	Ndufa9	T2D	Mitochondrion	Mitochondrial respiration
pyruvate dehydrogenase E1 component subunit alpha	P35486	acetyl-CoA biosynthetic process from pyruvate [GO:0006086]; glucose metabolic process [GO:0006006]; mitochondrial acetyl-CoA biosynthetic process from pyruvate [GO:0061732]; tricarboxylic acid cycle [GO:0006099]	pyruvate dehydrogenase (acetyl-transferring) activity [GO:0004739]; pyruvate dehydrogenase (NAD+) activity [GO:0034604]; pyruvate dehydrogenase activity [GO:0004738]	Mitochondrion matrix {ECO:0000269|PubMed:19341700}.	Pdha1	T2D	Mitochondrion	Mitochondrial respiration
mitochondrial carnitine/acylcarnitine carrier protein	Q9Z2Z6	carnitine transmembrane transport [GO:1902603]; in utero embryonic development [GO:0001701]	acyl carnitine transmembrane transporter activity [GO:0015227]	Mitochondrion inner membrane {ECO:0000250}; Multi-pass membrane protein {ECO:0000250}.	Scl25a20	T2D	Mitochondrion	FA metabolism
short-chain specific acyl-CoA dehydrogenase	Q07417	butyrate catabolic process [GO:0046359]; fatty acid beta-oxidation using acyl-CoA dehydrogenase [GO:0033539]	acyl-CoA dehydrogenase activity [GO:0003995]; butyryl-CoA dehydrogenase activity [GO:0004085]; fatty-acyl-CoA binding [GO:0000062]; flavin adenine dinucleotide binding [GO:0050660]; identical protein binding [GO:0042802]	Mitochondrion matrix {ECO:0000250|UniProtKB:Q3ZBF6}.	Acads	T2D	Mitochondrion	FA metabolism
medium-chain specific acyl-CoA dehydrogenase	P45952	cardiac muscle cell differentiation [GO:0055007]; carnitine biosynthetic process [GO:0045329]; carnitine metabolic process [GO:0009437]; carnitine metabolic process, CoA-linked [GO:0019254]; fatty acid beta-oxidation [GO:0006635]; fatty acid beta-oxidation using acyl-CoA dehydrogenase [GO:0033539]; glycogen biosynthetic process [GO:0005978]; heart development [GO:0007507]; liver development [GO:0…	acyl-CoA dehydrogenase activity [GO:0003995]; fatty-acyl-CoA binding [GO:0000062]; flavin adenine dinucleotide binding [GO:0050660]; identical protein binding [GO:0042802]; isomerase activity [GO:0016853]; medium-chain-acyl-CoA dehydrogenase activity [GO:0070991]	Mitochondrion matrix {ECO:0000250}.	Acadm	T2D	Mitochondrion	FA metabolism
60 kDa heat shock	P63038	'de novo' protein folding [GO:0006458]; activation of cysteine-type endopeptidase activity involved in apoptotic process [GO:0006919]; apoptotic mitochondrial changes [GO:0008637]; B cell activation [GO:0042113]; B cell cytokine production [GO:0002368]; B cell proliferation [GO:0042100]; cellular response to heat [GO:0034605]; cellular response to interleukin-7 [GO:0098761]; interaction with symb…	apolipoprotein A-I binding [GO:0034186]; apolipoprotein binding [GO:0034185]; ATP binding [GO:0005524]; chaperone binding [GO:0051087]; double-stranded RNA binding [GO:0003725]; enzyme binding [GO:0019899]; high-density lipoprotein particle binding [GO:0008035]; insulin binding [GO:0043559]; isomerase activity [GO:0016853]; lipopolysaccharide binding [GO:0001530]; modification-dependent protein b…	Mitochondrion matrix {ECO:0000250|UniProtKB:P10809}.	Hspd1	T2D	Mitochondrion	Chaperone/protein folding
10 kDa heat shock protein	Q64433	chaperone cofactor-dependent protein refolding [GO:0051085]	ATP binding [GO:0005524]; chaperone binding [GO:0051087]; metal ion binding [GO:0046872]; unfolded protein binding [GO:0051082]	Mitochondrion matrix {ECO:0000250|UniProtKB:P61604}.	Hspe1	T2D	Mitochondrion	Chaperone/protein folding
elongation factor Tu	Q8BFR5	mitochondrial translational elongation [GO:0070125]; response to ethanol [GO:0045471]; translational elongation [GO:0006414]	GTPase activity [GO:0003924]; GTP binding [GO:0005525]; translation elongation factor activity [GO:0003746]	Mitochondrion {ECO:0000250|UniProtKB:P49411}.	Tufm	CTR/T2D	Mitochondrion	Signal transduction
succinate dehydrogenase [ubiquinone] iron-sulfur subunit	Q9CQA3	aerobic respiration [GO:0009060]; respiratory electron transport chain [GO:0022904]; succinate metabolic process [GO:0006105]; tricarboxylic acid cycle [GO:0006099]	2 iron, 2 sulfur cluster binding [GO:0051537]; 3 iron, 4 sulfur cluster binding [GO:0051538]; 4 iron, 4 sulfur cluster binding [GO:0051539]; electron transfer activity [GO:0009055]; metal ion binding [GO:0046872]; succinate dehydrogenase (ubiquinone) activity [GO:0008177]; ubiquinone binding [GO:0048039]	Mitochondrion inner membrane {ECO:0000250}; Peripheral membrane protein {ECO:0000250}; Matrix side {ECO:0000250}.	Sdhb	CTR/T2D	Mitochondrion	Mitochondrial respiration
ATP synthase subunit beta	P56480	angiogenesis [GO:0001525]; ATP biosynthetic process [GO:0006754]; ATP metabolic process [GO:0046034]; cellular response to interleukin-7 [GO:0098761]; lipid metabolic process [GO:0006629]; mitochondrial ATP synthesis coupled proton transport [GO:0042776]; negative regulation of cell adhesion involved in substrate-bound cell migration [GO:0006933]; positive regulation of blood vessel endothelial c…	ADP binding [GO:0043531]; angiostatin binding [GO:0043532]; ATPase activity [GO:0016887]; ATP binding [GO:0005524]; calcium ion binding [GO:0005509]; lipoprotein particle receptor activity [GO:0030228]; MHC class I protein binding [GO:0042288]; proton-transporting ATPase activity, rotational mechanism [GO:0046961]; proton-transporting ATP synthase activity, rotational mechanism [GO:0046933]	Mitochondrion inner membrane {ECO:0000250|UniProtKB:P00829}; Peripheral membrane protein {ECO:0000250|UniProtKB:P00829}; Matrix side {ECO:0000250|UniProtKB:P00829}.	Atp5f1b	CTR/T2D	Mitochondrion	Mitochondrial respiration
ADP/ATP translocase 1	P48962	ADP transport [GO:0015866]; apoptotic mitochondrial changes [GO:0008637]; negative regulation of cardiac muscle cell apoptotic process [GO:0010667]; negative regulation of mitochondrial membrane permeability involved in apoptotic process [GO:1902109]; negative regulation of necroptotic process [GO:0060546]; positive regulation of cell growth involved in cardiac muscle cell development [GO:0061051…	ATP:ADP antiporter activity [GO:0005471]; enzyme binding [GO:0019899]	Mitochondrion inner membrane; Multi-pass membrane protein. Note=The complex formed with ARL2BP, ARL2 and SLC25A4 is expressed in mitochondria.	Slc25a4	CTR/T2D	Mitochondrion	Mitochondrial respiration
ATP synthase subunit O	Q9DB20	ATP biosynthetic process [GO:0006754]; ATP metabolic process [GO:0046034]; cellular response to cAMP [GO:0071320]; cellular response to cytokine stimulus [GO:0071345]; mitochondrial ATP synthesis coupled proton transport [GO:0042776]	ATPase activity [GO:0016887]; drug binding [GO:0008144]; estradiol binding [GO:1903924]; protein-containing complex binding [GO:0044877]; proton-transporting ATP synthase activity, rotational mechanism [GO:0046933]	Mitochondrion {ECO:0000250}. Mitochondrion inner membrane {ECO:0000250}.	Atp5po	CTR/T2D	Mitochondrion	Mitochondrial respiration
ATP synthase subunit gamma	Q91VR2	ATP biosynthetic process [GO:0006754]; ATP metabolic process [GO:0046034]; ATP synthesis coupled proton transport [GO:0015986]	ATPase activity [GO:0016887]; proton-transporting ATP synthase activity, rotational mechanism [GO:0046933]	Mitochondrion inner membrane {ECO:0000250|UniProtKB:P05631}; Peripheral membrane protein {ECO:0000250|UniProtKB:P05631}; Matrix side {ECO:0000250|UniProtKB:P05631}.	Atp5f1c	CTR/T2D	Mitochondrion	Mitochondrial respiration
citrate synthase	Q9CZU6	acetyl-CoA metabolic process [GO:0006084]; carbohydrate metabolic process [GO:0005975]; citrate metabolic process [GO:0006101]; oxaloacetate metabolic process [GO:0006107]; tricarboxylic acid cycle [GO:0006099]	citrate (Si)-synthase activity [GO:0004108]; transferase activity, transferring acyl groups, acyl groups converted into alkyl on transfer [GO:0046912]	Mitochondrion matrix {ECO:0000250}.	Cs	CTR/T2D	Mitochondrion	Mitochondrial respiration
cytochrome c oxidase subunit NDUFA4	Q62425		cytochrome-c oxidase activity [GO:0004129]; protein-containing complex binding [GO:0044877]	Mitochondrion inner membrane {ECO:0000250}; Peripheral membrane protein {ECO:0000250}; Matrix side {ECO:0000250}.	Ndufa4	CTR/T2D	Mitochondrion	Mitochondrial respiration
cytochrome b-c1 complex subunit 6	P99028	aerobic respiration [GO:0009060]; mitochondrial electron transport, ubiquinol to cytochrome c [GO:0006122]; protein heterooligomerization [GO:0051291]	protein-containing complex binding [GO:0044877]; ubiquinol-cytochrome-c reductase activity [GO:0008121]	Mitochondrion inner membrane {ECO:0000250|UniProtKB:P00127}.	Uqcrh	CTR/T2D	Mitochondrion	Mitochondrial respiration
pyruvate dehydrogenase E1 component subunit beta	Q9D051	acetyl-CoA biosynthetic process from pyruvate [GO:0006086]; glucose metabolic process [GO:0006006]; mitochondrial acetyl-CoA biosynthetic process from pyruvate [GO:0061732]; tricarboxylic acid cycle [GO:0006099]	pyruvate dehydrogenase (acetyl-transferring) activity [GO:0004739]; pyruvate dehydrogenase (NAD+) activity [GO:0034604]	Mitochondrion matrix {ECO:0000250}.	Pdhb	CTR/T2D	Mitochondrion	Mitochondrial respiration
2 4-dienoyl-CoA reductase	Q9CQ62	fatty acid beta-oxidation [GO:0006635]; positive regulation of cold-induced thermogenesis [GO:0120162]; protein homotetramerization [GO:0051289]	2,4-dienoyl-CoA reductase (NADPH) activity [GO:0008670]; NADPH binding [GO:0070402]	Mitochondrion {ECO:0000250|UniProtKB:Q16698}.	Decr1	CTR/T2D	Mitochondrion	FA metabolism
trifunctional enzyme subunit beta	Q99JY0	fatty acid beta-oxidation [GO:0006635]	3-hydroxyacyl-CoA dehydrogenase activity [GO:0003857]; acetyl-CoA C-acyltransferase activity [GO:0003988]; acetyl-CoA C-myristoyltransferase activity [GO:0050633]; enoyl-CoA hydratase activity [GO:0004300]; fatty-acyl-CoA binding [GO:0000062]; long-chain-3-hydroxyacyl-CoA dehydrogenase activity [GO:0016509]; long-chain-enoyl-CoA hydratase activity [GO:0016508]; NAD binding [GO:0051287]; protein-c…	Mitochondrion {ECO:0000250|UniProtKB:P55084}. Mitochondrion inner membrane {ECO:0000250|UniProtKB:P55084}. Mitochondrion outer membrane {ECO:0000250|UniProtKB:P55084}. Endoplasmic reticulum {ECO:0000250|UniProtKB:P55084}. Note=Protein stability and association with membranes require HADHA. {ECO:0000250|UniProtKB:P55084}.	Hadhb	CTR/T2D	Mitochondrion	FA metabolism
trifunctional enzyme subunit alpha	Q8BMS1	cardiolipin acyl-chain remodeling [GO:0035965]; fatty acid beta-oxidation [GO:0006635]; response to drug [GO:0042493]; response to insulin [GO:0032868]	3-hydroxyacyl-CoA dehydrogenase activity [GO:0003857]; acetyl-CoA C-acyltransferase activity [GO:0003988]; enoyl-CoA hydratase activity [GO:0004300]; fatty-acyl-CoA binding [GO:0000062]; long-chain-3-hydroxyacyl-CoA dehydrogenase activity [GO:0016509]; long-chain-enoyl-CoA hydratase activity [GO:0016508]; NAD binding [GO:0051287]; protein-containing complex binding [GO:0044877]	Mitochondrion {ECO:0000250|UniProtKB:P40939}. Mitochondrion inner membrane {ECO:0000250|UniProtKB:P40939}. Note=Protein stability and association with mitochondrion inner membrane do not require HADHB. {ECO:0000250|UniProtKB:P40939}.	Hadha	CTR/T2D	Mitochondrion	FA metabolism
3-ketoacyl-CoA thiolase	Q8BWT1	acetyl-CoA metabolic process [GO:0006084]; cellular response to hypoxia [GO:0071456]; fatty acid beta-oxidation [GO:0006635]; negative regulation of mitochondrial membrane permeability involved in apoptotic process [GO:1902109]; negative regulation of mitochondrial outer membrane permeabilization involved in apoptotic signaling pathway [GO:1901029]	acetyl-CoA C-acetyltransferase activity [GO:0003985]; acetyl-CoA C-acyltransferase activity [GO:0003988]; acetyl-CoA hydrolase activity [GO:0003986]; acyl-CoA hydrolase activity [GO:0047617]; myristoyl-CoA hydrolase activity [GO:0102991]; palmitoyl-CoA hydrolase activity [GO:0016290]	Mitochondrion {ECO:0000250|UniProtKB:P42765}.	Acaa2	CTR/T2D	Mitochondrion	FA metabolism
acetyl-CoA acetyltransferase	Q8QZT1	acetyl-CoA biosynthetic process [GO:0006085]; acetyl-CoA catabolic process [GO:0046356]; adipose tissue development [GO:0060612]; brain development [GO:0007420]; coenzyme A biosynthetic process [GO:0015937]; coenzyme A metabolic process [GO:0015936]; fatty acid beta-oxidation [GO:0006635]; isoleucine catabolic process [GO:0006550]; ketone body catabolic process [GO:0046952]; liver development [GO…	acetyl-CoA C-acetyltransferase activity [GO:0003985]; acetyl-CoA C-acyltransferase activity [GO:0003988]; C-acetyltransferase activity [GO:0016453]; coenzyme binding [GO:0050662]; enzyme binding [GO:0019899]; identical protein binding [GO:0042802]; metal ion binding [GO:0046872]; protein homodimerization activity [GO:0042803]	Mitochondrion {ECO:0000250|UniProtKB:P24752}.	Acat1	CTR/T2D	Mitochondrion	FA metabolism
very long-chain specific acyl-CoA dehydrogenase	P50544	epithelial cell differentiation [GO:0030855]; fatty acid beta-oxidation [GO:0006635]; fatty acid beta-oxidation using acyl-CoA dehydrogenase [GO:0033539]; fatty acid catabolic process [GO:0009062]; negative regulation of fatty acid biosynthetic process [GO:0045717]; negative regulation of fatty acid oxidation [GO:0046322]; regulation of cholesterol metabolic process [GO:0090181]; response to cold…	acyl-CoA dehydrogenase activity [GO:0003995]; fatty-acyl-CoA binding [GO:0000062]; flavin adenine dinucleotide binding [GO:0050660]; long-chain-acyl-CoA dehydrogenase activity [GO:0004466]; very-long-chain-acyl-CoA dehydrogenase activity [GO:0017099]	Mitochondrion inner membrane.	Acadvl	CTR/T2D	Mitochondrion	FA metabolism
enoyl-CoA delta isomerase 1	P42125	fatty acid beta-oxidation [GO:0006635]	dodecenoyl-CoA delta-isomerase activity [GO:0004165]; enoyl-CoA hydratase activity [GO:0004300]; identical protein binding [GO:0042802]	Mitochondrion matrix.	Eci1	CTR/T2D	Mitochondrion	FA metabolism
electron transfer flavoprotein subunit beta	Q9DCW4	fatty acid beta-oxidation using acyl-CoA dehydrogenase [GO:0033539]	electron transfer activity [GO:0009055]; nucleotide binding [GO:0000166]	Mitochondrion matrix {ECO:0000250|UniProtKB:P38117}.	Etfb	CTR/T2D	Mitochondrion	FA metabolism
long-chain specific acyl-CoA dehydrogenase	P51174	carnitine catabolic process [GO:0042413]; carnitine metabolic process, CoA-linked [GO:0019254]; cellular lipid catabolic process [GO:0044242]; fatty acid beta-oxidation using acyl-CoA dehydrogenase [GO:0033539]; fatty acid catabolic process [GO:0009062]; long-chain fatty acid catabolic process [GO:0042758]; negative regulation of fatty acid biosynthetic process [GO:0045717]; negative regulation o…	fatty-acyl-CoA binding [GO:0000062]; flavin adenine dinucleotide binding [GO:0050660]; identical protein binding [GO:0042802]; long-chain-acyl-CoA dehydrogenase activity [GO:0004466]; palmitoyl-CoA oxidase activity [GO:0016401]	Mitochondrion matrix {ECO:0000250|UniProtKB:P15650}.	Acadl	CTR/T2D	Mitochondrion	FA metabolism
isovaleryl-CoA dehydrogenase	Q9JHI5	fatty acid beta-oxidation using acyl-CoA dehydrogenase [GO:0033539]; leucine catabolic process [GO:0006552]	flavin adenine dinucleotide binding [GO:0050660]; identical protein binding [GO:0042802]; isovaleryl-CoA dehydrogenase activity [GO:0008470]	Mitochondrion matrix.	Ivd	CTR/T2D	Mitochondrion	FA metabolism
superoxide dismutase [Mn]	P09671	acetylcholine-mediated vasodilation involved in regulation of systemic arterial blood pressure [GO:0003069]; age-dependent response to oxidative stress [GO:0001306]; age-dependent response to reactive oxygen species [GO:0001315]; apoptotic mitochondrial changes [GO:0008637]; cellular response to ethanol [GO:0071361]; detection of oxygen [GO:0003032]; erythrophore differentiation [GO:0048773]; glu…	DNA binding [GO:0003677]; enzyme binding [GO:0019899]; identical protein binding [GO:0042802]; manganese ion binding [GO:0030145]; metal ion binding [GO:0046872]; oxidoreductase activity [GO:0016491]; oxygen binding [GO:0019825]; superoxide dismutase activity [GO:0004784]	Mitochondrion matrix.	Sod2	CTR/T2D	Mitochondrion	Cell redox homeostasis
NADH dehydrogenase [ubiquinone] 1 alpha subcomplex subunit 13	Q9ERS2	apoptotic signaling pathway [GO:0097190]; cellular response to interferon-beta [GO:0035458]; cellular response to retinoic acid [GO:0071300]; extrinsic apoptotic signaling pathway [GO:0097191]; mitochondrial respiratory chain complex I assembly [GO:0032981]; negative regulation of cell growth [GO:0030308]; negative regulation of intrinsic apoptotic signaling pathway [GO:2001243]; negative regulat…	ATP binding [GO:0005524]; NADH dehydrogenase (ubiquinone) activity [GO:0008137]; NADH dehydrogenase activity [GO:0003954]	Mitochondrion inner membrane {ECO:0000305|PubMed:12628925}; Single-pass membrane protein {ECO:0000305|PubMed:12628925}; Matrix side {ECO:0000305|PubMed:12628925}. Nucleus {ECO:0000269|PubMed:12628925}. Note=Localizes mainly in the mitochondrion. May be translocated into the nucleus upon IFN/RA treatment. {ECO:0000250|UniProtKB:Q9P0J0}.	Ndufa13	CTR/T2D	Mitochondrion	Apoptosis/Inflammation
ubiquitin-60S ribosomal protein L40	P62984	modification-dependent protein catabolic process [GO:0019941]; protein ubiquitination [GO:0016567]; response to insecticide [GO:0017085]; translation [GO:0006412]	protein tag [GO:0031386]; structural constituent of ribosome [GO:0003735]; ubiquitin protein ligase binding [GO:0031625]	[Ubiquitin]: Cytoplasm {ECO:0000250}. Nucleus {ECO:0000250}.; [60S ribosomal protein L40]: Cytoplasm {ECO:0000250}.	Uba52	CTR	Cytoplasm	Other
actin-binding protein anillin	Q8K298	actomyosin contractile ring assembly [GO:0000915]; cortical cytoskeleton organization [GO:0030865]; glomerular visceral epithelial cell migration [GO:0090521]; hematopoietic progenitor cell differentiation [GO:0002244]; mitotic cytokinesis [GO:0000281]; positive regulation of bleb assembly [GO:1904172]; protein localization to mitotic actomyosin contractile ring [GO:1904498]; septin ring organiza…	actin binding [GO:0003779]; GTP-Rho binding [GO:0017049]	Nucleus {ECO:0000250}. Cytoplasm, cytoskeleton {ECO:0000250}. Cytoplasm, cell cortex {ECO:0000250|UniProtKB:Q9NQW6}. Cell projection, bleb {ECO:0000250|UniProtKB:Q9NQW6}. Note=Mainly found in the nucleus during interphase. Colocalizes with cortical F-actin upon nuclear envelope breakdown in mitosis and subsequently concentrates in the area of the prospective contractile ring in anaphase. This pat…	Anln	T2D	Nucleus	Structural/contractile
obscurin isoform 1	A2AAJ9	cell differentiation [GO:0030154]; multicellular organism development [GO:0007275]; negative regulation of phosphatidylinositol 3-kinase signaling [GO:0014067]; protein autophosphorylation [GO:0046777]; protein phosphorylation [GO:0006468]	ankyrin binding [GO:0030506]; ATP binding [GO:0005524]; cadherin binding [GO:0045296]; calmodulin binding [GO:0005516]; guanyl-nucleotide exchange factor activity [GO:0005085]; metal ion binding [GO:0046872]; phosphatidylinositol-3,4,5-trisphosphate binding [GO:0005547]; phosphatidylinositol-3,4-bisphosphate binding [GO:0043325]; phosphatidylinositol-3-phosphate binding [GO:0032266]; phosphatidyl…	Cytoplasm, myofibril, sarcomere, M line {ECO:0000269|PubMed:23392350}. Cytoplasm, myofibril, sarcomere, Z line {ECO:0000269|PubMed:23392350}. Cell membrane, sarcolemma {ECO:0000269|PubMed:23392350}. Nucleus {ECO:0000269|PubMed:23392350}. Secreted {ECO:0000269|PubMed:23392350}. Note=Colocalizes with CDH2 and ATP1B1 to the sarcolemma and to intercalating disks in cardiac muscles. Colocalizes with A…	Obscn	T2D	Cytoplasm	Other
glyceraldehyde-3-phosphate dehydrogenase	P16858	antimicrobial humoral immune response mediated by antimicrobial peptide [GO:0061844]; apoptotic process [GO:0006915]; cAMP-mediated signaling [GO:0019933]; carbohydrate metabolic process [GO:0005975]; cellular response to interferon-gamma [GO:0071346]; defense response to fungus [GO:0050832]; gluconeogenesis [GO:0006094]; glycolytic process [GO:0006096]; killing by host of symbiont cells [GO:0051…	aspartic-type endopeptidase inhibitor activity [GO:0019828]; disordered domain specific binding [GO:0097718]; enzyme binding [GO:0019899]; glyceraldehyde-3-phosphate dehydrogenase (NAD+) (phosphorylating) activity [GO:0004365]; identical protein binding [GO:0042802]; microtubule binding [GO:0008017]; NAD binding [GO:0051287]; NADP binding [GO:0050661]; peptidyl-cysteine S-nitrosylase activity [GO…	Cytoplasm, cytosol {ECO:0000250}. Nucleus {ECO:0000250}. Cytoplasm, cytoskeleton {ECO:0000250}. Note=Translocates to the nucleus following S-nitrosylation and interaction with SIAH1, which contains a nuclear localization signal. {ECO:0000250}.	Gapdh	T2D	Cytoplasm	Apoptosis/Inflammation
titin	A2ASS6	adult heart development [GO:0007512]; cardiac muscle contraction [GO:0060048]; cardiac muscle fiber development [GO:0048739]; cardiac muscle hypertrophy [GO:0003300]; cardiac muscle tissue morphogenesis [GO:0055008]; cardiac myofibril assembly [GO:0055003]; detection of muscle stretch [GO:0035995]; forward locomotion [GO:0043056]; heart development [GO:0007507]; heart growth [GO:0060419]; heart m…	actin filament binding [GO:0051015]; actinin binding [GO:0042805]; ankyrin binding [GO:0030506]; ATP binding [GO:0005524]; calcium ion binding [GO:0005509]; calmodulin binding [GO:0005516]; enzyme binding [GO:0019899]; identical protein binding [GO:0042802]; muscle alpha-actinin binding [GO:0051371]; protease binding [GO:0002020]; protein kinase binding [GO:0019901]; protein self-association [GO:…	Cytoplasm {ECO:0000305}. Nucleus {ECO:0000250|UniProtKB:Q8WZ42}.	Ttn	CTR/T2D	Cytoplasm	Structural/contractile
microtubule-associated protein 1B	P14873	axon extension [GO:0048675]; axonogenesis [GO:0007409]; cellular process [GO:0009987]; cellular response to growth factor stimulus [GO:0071363]; cellular response to peptide hormone stimulus [GO:0071375]; dendrite development [GO:0016358]; developmental maturation [GO:0021700]; establishment of monopolar cell polarity [GO:0061162]; induction of synaptic plasticity by chemical substance [GO:005191…	actin binding [GO:0003779]; cytoskeletal regulatory protein binding [GO:0005519]; microtubule binding [GO:0008017]; phospholipid binding [GO:0005543]; protein-containing complex binding [GO:0044877]; tubulin binding [GO:0015631]	Cytoplasm, cytoskeleton {ECO:0000305|PubMed:21984824}. Cytoplasm {ECO:0000250}. Cell junction, synapse {ECO:0000269|PubMed:21984824}. Cell projection, dendritic spine {ECO:0000269|PubMed:21984824}. Note=Colocalizes with DAPK1 in the microtubules and cortical actin fibers. {ECO:0000250}.; [MAP1 light chain LC1]: Cytoplasm {ECO:0000269|PubMed:21288476}.	Map1b	CTR	Cytoplasm	Structural/contractile
myomesin-1	Q62234	cardiac muscle fiber development [GO:0048739]; cardiac muscle tissue morphogenesis [GO:0055008]; cardiac myofibril assembly [GO:0055003]; extraocular skeletal muscle development [GO:0002074]; muscle contraction [GO:0006936]; positive regulation of gene expression [GO:0010628]; positive regulation of protein secretion [GO:0050714]; protein kinase A signaling [GO:0010737]; sarcomere organization [G…	actin filament binding [GO:0051015]; identical protein binding [GO:0042802]; kinase binding [GO:0019900]; muscle alpha-actinin binding [GO:0051371]; protein homodimerization activity [GO:0042803]; structural constituent of cytoskeleton [GO:0005200]; structural constituent of muscle [GO:0008307]	Cytoplasm, myofibril, sarcomere, M line {ECO:0000269|PubMed:18177667, ECO:0000269|PubMed:22562206}.	Myom1	CTR	Cytoplasm	Structural/contractile
tropomyosin beta chain	P58774	actin filament organization [GO:0007015]; muscle contraction [GO:0006936]; regulation of ATPase activity [GO:0043462]	actin filament binding [GO:0051015]; identical protein binding [GO:0042802]; protein heterodimerization activity [GO:0046982]; protein homodimerization activity [GO:0042803]; structural constituent of cytoskeleton [GO:0005200]	Cytoplasm, cytoskeleton {ECO:0000250|UniProtKB:P58775}. Note=Associates with F-actin stress fibers. {ECO:0000250|UniProtKB:P58775}.	Tpm2	CTR	Cytoplasm	Structural/contractile
desmin	P31001	intermediate filament organization [GO:0045109]; muscle organ development [GO:0007517]	cytoskeletal protein binding [GO:0008092]; identical protein binding [GO:0042802]; structural constituent of cytoskeleton [GO:0005200]	Cytoplasm, myofibril, sarcomere, Z line {ECO:0000269|PubMed:26787680, ECO:0000269|PubMed:28469177}. Cytoplasm {ECO:0000269|PubMed:25394388, ECO:0000269|PubMed:26787680}. Cell membrane, sarcolemma {ECO:0000269|PubMed:25394388}. Nucleus {ECO:0000269|PubMed:26787680}. Note=Localizes in the intercalated disks which occur at the Z line of cardiomyocytes (By similarity). Localizes in the nucleus exclus…	Des	CTR	Cytoplasm	Structural/contractile
epiplakin	Q8R0W0	cytoskeleton organization [GO:0007010]; intermediate filament bundle assembly [GO:0045110]; intermediate filament cytoskeleton organization [GO:0045104]; intermediate filament organization [GO:0045109]; negative regulation of cell migration [GO:0030336]; negative regulation of epithelial cell proliferation [GO:0050680]; negative regulation of keratinocyte migration [GO:0051548]; negative regulati…	intermediate filament binding [GO:0019215]; keratin filament binding [GO:1990254]	Cytoplasm, cytoskeleton {ECO:0000269|PubMed:20926261, ECO:0000269|PubMed:25617501}. Apicolateral cell membrane {ECO:0000269|PubMed:25232867}. Basolateral cell membrane {ECO:0000269|PubMed:23599337}. Cell junction {ECO:0000269|PubMed:23599337}. Cell junction, hemidesmosome {ECO:0000250|UniProtKB:P58107}. Cell junction, tight junction {ECO:0000250|UniProtKB:P58107}. Cell projection {ECO:0000250|Uni…	Eppk1	CTR	Cytoplasm	Structural/contractile
C-Jun-amino-terminal kinase-interacting protein 2	Q9ERE9	behavioral fear response [GO:0001662]; dendrite morphogenesis [GO:0048813]; excitatory postsynaptic potential [GO:0060079]; JNK cascade [GO:0007254]; MAPK cascade [GO:0000165]; mating behavior [GO:0007617]; negative regulation of apoptotic signaling pathway [GO:2001234]; negative regulation of canonical Wnt signaling pathway [GO:0090090]; nonassociative learning [GO:0046958]; positive regulation …	kinesin binding [GO:0019894]; MAP-kinase scaffold activity [GO:0005078]; protein-containing complex binding [GO:0044877]; protein kinase activator activity [GO:0030295]; protein kinase binding [GO:0019901]	Cytoplasm {ECO:0000250|UniProtKB:Q13387}. Note=Accumulates in cell surface projections. {ECO:0000250|UniProtKB:Q13387}.	Mapk8ip2	CTR	Cytoplasm	Signal transduction
protein Shroom3	Q9QXN0	actin cytoskeleton organization [GO:0030036]; actin filament organization [GO:0007015]; apical protein localization [GO:0045176]; cell morphogenesis [GO:0000902]; cellular pigment accumulation [GO:0043482]; columnar/cuboidal epithelial cell development [GO:0002066]; neural tube closure [GO:0001843]; pattern specification process [GO:0007389]; regulation of cell shape [GO:0008360]	actin binding [GO:0003779]; actin filament binding [GO:0051015]	Cell junction, adherens junction {ECO:0000269|PubMed:10589677}. Cytoplasm, cytoskeleton {ECO:0000269|PubMed:10589677}. Apical cell membrane {ECO:0000269|PubMed:22493320}; Peripheral membrane protein {ECO:0000305}. Note=Colocalizes with F-actin in stress fibers and adherens junctions.	Shroom3	T2D	Cytoplasm	Structural/contractile
pyrin	Q9JJ26	inflammatory response [GO:0006954]; negative regulation of cytokine production involved in inflammatory response [GO:1900016]; negative regulation of inflammatory response [GO:0050728]; negative regulation of interleukin-12 production [GO:0032695]; negative regulation of interleukin-1 beta production [GO:0032691]; negative regulation of macrophage inflammatory protein 1 alpha production [GO:00716…	actin binding [GO:0003779]; identical protein binding [GO:0042802]; zinc ion binding [GO:0008270]	Cytoplasm, cytoskeleton {ECO:0000250}. Cell projection, ruffle {ECO:0000250}. Cell projection, lamellipodium {ECO:0000250}. Cytoplasm {ECO:0000250|UniProtKB:O15553}. Cytoplasmic vesicle, autophagosome {ECO:0000250|UniProtKB:O15553}. Nucleus {ECO:0000250}. Note=Associated with microtubules and with the filamentous actin of perinuclear filaments and peripheral lamellar ruffles. In pre-apoptotic cel…	Mefv	T2D	Cytoplasm	Structural/contractile
actin alpha cardiac muscle 1	P68033	actin filament-based movement [GO:0030048]; actin filament organization [GO:0007015]; actin-mediated cell contraction [GO:0070252]; actin-myosin filament sliding [GO:0033275]; actomyosin structure organization [GO:0031032]; cardiac muscle contraction [GO:0060048]; cardiac muscle tissue morphogenesis [GO:0055008]; cardiac myofibril assembly [GO:0055003]; heart contraction [GO:0060047]; mesenchyme …	ATPase activity [GO:0016887]; ATP binding [GO:0005524]; myosin binding [GO:0017022]	Cytoplasm, cytoskeleton.	Actc1	T2D	Cytoplasm	Structural/contractile
glial fibrillary acidic protein	P03995	astrocyte development [GO:0014002]; Bergmann glial cell differentiation [GO:0060020]; extracellular matrix organization [GO:0030198]; intermediate filament-based process [GO:0045103]; intermediate filament organization [GO:0045109]; long-term synaptic potentiation [GO:0060291]; negative regulation of neuron projection development [GO:0010977]; neuron projection regeneration [GO:0031102]; positive…	identical protein binding [GO:0042802]; integrin binding [GO:0005178]; kinase binding [GO:0019900]; structural constituent of cytoskeleton [GO:0005200]	Cytoplasm {ECO:0000250}. Note=Associated with intermediate filaments. {ECO:0000250}.	Gfap	T2D	Cytoplasm	Structural/contractile
FERM and PDZ domain-containing protein 4	A2AFR3	positive regulation of synapse structural plasticity [GO:0051835]; postsynaptic actin cytoskeleton organization [GO:0098974]	phosphatidylinositol-4,5-bisphosphate binding [GO:0005546]	Cell projection, dendritic spine {ECO:0000250|UniProtKB:Q14CM0}.	Frmpd4	T2D	Cytoplasm	Structural/contractile
codanin-1	Q8CC12	chromatin assembly [GO:0031497]; chromatin organization [GO:0006325]; negative regulation of DNA replication [GO:0008156]; nuclear envelope organization [GO:0006998]; protein localization [GO:0008104]	N/D	Cytoplasm {ECO:0000250}. Nucleus {ECO:0000250}. Membrane {ECO:0000305}; Multi-pass membrane protein {ECO:0000305}. Note=Mainly detected as a cytoplasmic protein.	Cdan1	T2D	Cytoplasm	Regulation of gene expression
abnormal spindle-like microcephaly-associated protein homolog	Q8CJ27	brain development [GO:0007420]; cerebral cortex development [GO:0021987]; developmental growth [GO:0048589]; forebrain neuroblast division [GO:0021873]; maintenance of centrosome location [GO:0051661]; male gonad development [GO:0008584]; negative regulation of asymmetric cell division [GO:0045769]; negative regulation of neuron differentiation [GO:0045665]; neuronal stem cell population maintena…	calmodulin binding [GO:0005516]	Cytoplasm {ECO:0000269|PubMed:9819352}. Cytoplasm, cytoskeleton, spindle {ECO:0000269|PubMed:28436967}. Nucleus {ECO:0000269|PubMed:9819352}. Note=Localizes to spindle poles during mitosis. Associates with microtubule minus ends (PubMed:28436967). The nuclear-cytoplasmic distribution could be regulated by the availability of calmodulin. {ECO:0000269|PubMed:28436967}.	Aspm	T2D	Cytoplasm	Other
sickle tail protein isoform c	A2AQ25	embryonic skeletal system development [GO:0048706]	N/D	Cytoplasm {ECO:0000269|PubMed:16204209}.	Skt	T2D	Cytoplasm	Other
type II keratin	Q9R0H5	hair follicle morphogenesis [GO:0031069]; intermediate filament organization [GO:0045109]	N/D	Cytoplasm, cytoskeleton {ECO:0000250|UniProtKB:Q3SY84}.	Krt71	T2D	Cytoplasm	Other
acyl-coenzyme A thioesterase 13	Q9CQR4	negative regulation of cold-induced thermogenesis [GO:0120163]; protein homotetramerization [GO:0051289]	acyl-CoA hydrolase activity [GO:0047617]	Cytoplasm, cytosol {ECO:0000269|PubMed:17045243, ECO:0000269|PubMed:17704541, ECO:0000269|PubMed:19405909}. Mitochondrion {ECO:0000269|PubMed:19405909}. Nucleus {ECO:0000269|PubMed:17045243, ECO:0000269|PubMed:17704541}. Cytoplasm, cytoskeleton, spindle {ECO:0000269|PubMed:17045243}. Note=During interphase, found both in the nucleus and in the cytoplasm. At mitosis, localizes to the spindle. Colo…	Acot13	T2D	Cytoplasm	FA metabolism
tropomyosin alpha-1 chain	P58771	actin filament capping [GO:0051693]; actin filament organization [GO:0007015]; cardiac muscle contraction [GO:0060048]; in utero embryonic development [GO:0001701]; muscle filament sliding [GO:0030049]; negative regulation of cell migration [GO:0030336]; positive regulation of ATPase activity [GO:0032781]; positive regulation of cell adhesion [GO:0045785]; positive regulation of heart rate by epi…	actin binding [GO:0003779]; actin filament binding [GO:0051015]; disordered domain specific binding [GO:0097718]; identical protein binding [GO:0042802]; protein heterodimerization activity [GO:0046982]; protein homodimerization activity [GO:0042803]; protein N-terminus binding [GO:0047485]; structural constituent of cytoskeleton [GO:0005200]	Cytoplasm, cytoskeleton {ECO:0000250|UniProtKB:P04692}. Note=Associates with F-actin stress fibers. {ECO:0000250|UniProtKB:P04692}.	Tpm1	CTR/T2D	Cytoplasm	Structural/contractile
tropomyosin alpha-3 chain	P21107	actin filament organization [GO:0007015]	actin filament binding [GO:0051015]	[Isoform 2]: Cytoplasm, cytoskeleton.	Tpm3	CTR/T2D	Cytoplasm	Structural/contractile
myosin-4	Q5SX39	muscle contraction [GO:0006936]; response to activity [GO:0014823]	actin filament binding [GO:0051015]; ATP binding [GO:0005524]; calmodulin binding [GO:0005516]; double-stranded RNA binding [GO:0003725]; motor activity [GO:0003774]	Cytoplasm, myofibril. Note=Thick filaments of the myofibrils.	Myh4	CTR/T2D	Cytoplasm	Structural/contractile
myosin-1	Q5SX40	muscle contraction [GO:0006936]	actin filament binding [GO:0051015]; ATP binding [GO:0005524]; calmodulin binding [GO:0005516]; motor activity [GO:0003774]	Cytoplasm, myofibril. Note=Thick filaments of the myofibrils.	Myh1	CTR/T2D	Cytoplasm	Structural/contractile
myosin-3	P13541	ATP metabolic process [GO:0046034]; skeletal muscle contraction [GO:0003009]	actin filament binding [GO:0051015]; ATPase activity, coupled [GO:0042623]; ATP binding [GO:0005524]; calmodulin binding [GO:0005516]; microfilament motor activity [GO:0000146]	Cytoplasm, myofibril. Note=Thick filaments of the myofibrils.	Myh3	CTR/T2D	Cytoplasm	Structural/contractile
myosin regulatory light chain 2	P51667	cardiac muscle contraction [GO:0060048]; cardiac myofibril assembly [GO:0055003]; heart contraction [GO:0060047]; heart development [GO:0007507]; heart morphogenesis [GO:0003007]; muscle cell fate specification [GO:0042694]; muscle fiber development [GO:0048747]; negative regulation of cell growth [GO:0030308]; positive regulation of the force of heart contraction [GO:0098735]; post-embryonic dev…	actin monomer binding [GO:0003785]; calcium ion binding [GO:0005509]	Cytoplasm, myofibril, sarcomere, A band {ECO:0000250|UniProtKB:P08733}.	Myl2	CTR/T2D	Cytoplasm	Structural/contractile
myosin-7	Q91Z83	adult heart development [GO:0007512]; ATP metabolic process [GO:0046034]; cardiac muscle contraction [GO:0060048]; cardiac muscle hypertrophy in response to stress [GO:0014898]; muscle contraction [GO:0006936]; muscle filament sliding [GO:0030049]; regulation of heart rate [GO:0002027]; regulation of slow-twitch skeletal muscle fiber contraction [GO:0031449]; regulation of the force of heart cont…	actin-dependent ATPase activity [GO:0030898]; actin filament binding [GO:0051015]; ATPase activity [GO:0016887]; ATP binding [GO:0005524]; calmodulin binding [GO:0005516]; identical protein binding [GO:0042802]; microfilament motor activity [GO:0000146]; protein-containing complex binding [GO:0044877]	Cytoplasm, myofibril {ECO:0000250|UniProtKB:P02564}. Cytoplasm, myofibril, sarcomere {ECO:0000250|UniProtKB:P02564}. Note=Thick filaments of the myofibrils. {ECO:0000250|UniProtKB:P02564}.	Myh7	CTR/T2D	Cytoplasm	Structural/contractile
actin alpha skeletal muscle	P68134	cellular response to organonitrogen compound [GO:0071417]; mesenchyme migration [GO:0090131]; positive regulation of gene expression [GO:0010628]; response to extracellular stimulus [GO:0009991]; response to lithium ion [GO:0010226]; response to mechanical stimulus [GO:0009612]; response to steroid hormone [GO:0048545]; skeletal muscle fiber adaptation [GO:0043503]; skeletal muscle fiber developm…	ATP binding [GO:0005524]	Cytoplasm, cytoskeleton.	Acta1	CTR/T2D	Cytoplasm	Structural/contractile
actin cytoplasmic	P60710	axonogenesis [GO:0007409]; cell motility [GO:0048870]; cellular response to cytochalasin B [GO:0072749]; cellular response to electrical stimulus [GO:0071257]; negative regulation of cyclin-dependent protein kinase activity [GO:1904030]; negative regulation of protein binding [GO:0032091]; postsynaptic actin cytoskeleton organization [GO:0098974]; regulation of cyclin-dependent protein serine/thr…	ATP binding [GO:0005524]; identical protein binding [GO:0042802]; kinesin binding [GO:0019894]; nitric-oxide synthase binding [GO:0050998]; protein kinase binding [GO:0019901]; structural constituent of postsynaptic actin cytoskeleton [GO:0098973]; Tat protein binding [GO:0030957]	Cytoplasm, cytoskeleton. Nucleus {ECO:0000269|PubMed:23558171, ECO:0000269|PubMed:25759381}. Note=Localized in cytoplasmic mRNP granules containing untranslated mRNAs. {ECO:0000250|UniProtKB:P60709}.	Actb	CTR/T2D	Cytoplasm	Structural/contractile
actin aortic smooth muscle	P62737	glomerular mesangial cell development [GO:0072144]; mesenchyme migration [GO:0090131]; muscle contraction [GO:0006936]; positive regulation of ERK1 and ERK2 cascade [GO:0070374]; positive regulation of gene expression [GO:0010628]; positive regulation of hepatic stellate cell activation [GO:2000491]; positive regulation of hepatic stellate cell contraction [GO:0061874]; positive regulation of hep…	ATP binding [GO:0005524]; protein kinase binding [GO:0019901]	Cytoplasm, cytoskeleton.	Acta2	CTR/T2D	Cytoplasm	Structural/contractile
beta-actin-like protein 2	Q8BFZ3	synaptic vesicle endocytosis [GO:0048488]	ATP binding [GO:0005524]; structural constituent of postsynaptic actin cytoskeleton [GO:0098973]	Cytoplasm, cytoskeleton {ECO:0000250}.	Actbl2	CTR/T2D	Cytoplasm	Other
isocitrate dehydrogenase [NADP]	O88844	2-oxoglutarate metabolic process [GO:0006103]; female gonad development [GO:0008585]; glutathione metabolic process [GO:0006749]; glyoxylate cycle [GO:0006097]; isocitrate metabolic process [GO:0006102]; NADP metabolic process [GO:0006739]; regulation of phospholipid biosynthetic process [GO:0071071]; regulation of phospholipid catabolic process [GO:0060696]; response to organic cyclic compound […	identical protein binding [GO:0042802]; isocitrate dehydrogenase (NADP+) activity [GO:0004450]; isocitrate dehydrogenase activity [GO:0004448]; magnesium ion binding [GO:0000287]; NAD binding [GO:0051287]; NADP binding [GO:0050661]; protein homodimerization activity [GO:0042803]	Cytoplasm, cytosol {ECO:0000250|UniProtKB:P41562}.	Idh	CTR/T2D	Cytoplasm	Mitochondrial respiration
malate dehydrogenase	P14152	carbohydrate metabolic process [GO:0005975]; malate metabolic process [GO:0006108]; NADH metabolic process [GO:0006734]; NAD metabolic process [GO:0019674]; oxaloacetate metabolic process [GO:0006107]; tricarboxylic acid cycle [GO:0006099]	L-malate dehydrogenase activity [GO:0030060]; malate dehydrogenase activity [GO:0016615]; NAD binding [GO:0051287]	Cytoplasm.	Mdh1	CTR/T2D	Cytoplasm	Mitochondrial respiration
aconitate hydratase	P28271	cellular iron ion homeostasis [GO:0006879]; citrate metabolic process [GO:0006101]; intestinal absorption [GO:0050892]; post-embryonic development [GO:0009791]; regulation of gene expression [GO:0010468]; regulation of translation [GO:0006417]; response to iron(II) ion [GO:0010040]; tricarboxylic acid cycle [GO:0006099]	3 iron, 4 sulfur cluster binding [GO:0051538]; 4 iron, 4 sulfur cluster binding [GO:0051539]; aconitate hydratase activity [GO:0003994]; citrate dehydratase activity [GO:0047780]; iron-responsive element binding [GO:0030350]; iron-sulfur cluster binding [GO:0051536]; metal ion binding [GO:0046872]; mRNA 5'-UTR binding [GO:0048027]; RNA binding [GO:0003723]	Cytoplasm.	Aco1	CTR/T2D	Cytoplasm	Metal ion binding
myosin light chain 4	Q9CZ19	cardiac muscle contraction [GO:0060048]; positive regulation of ATPase activity [GO:0032781]; regulation of the force of heart contraction [GO:0002026]	actin filament binding [GO:0051015]; actin monomer binding [GO:0003785]; calcium ion binding [GO:0005509]	N/D	Myl4	CTR	Other or N/D	Structural/contractile
keratin type I cuticular Ha6	B1AQ75	regulation of keratinocyte differentiation [GO:0045616]	structural constituent of epidermis [GO:0030280]	N/D	Krt36	CTR	Other or N/D	Structural/contractile
helicase SRCAP	A0A087WQ44	ATP-dependent chromatin remodeling [GO:0043044]; chromatin remodeling [GO:0006338]; gene silencing [GO:0016458]; histone exchange [GO:0043486]	ATPase activity [GO:0016887]; ATP binding [GO:0005524]; DNA binding [GO:0003677]; histone binding [GO:0042393]	N/D	Srcap	CTR	Other or N/D	Regulation of gene expression
histidine triad nucleotide-binding protein 2	Q5M9J2		catalytic activity [GO:0003824]	N/D	Hint2	CTR	Other or N/D	N/D
zinc finger protein 474	Q6V5K9		metal ion binding [GO:0046872]	N/D	Znf474	CTR	Other or N/D	Metal ion binding
zinc finger SWIM domain-containing protein 8	Q3UHH1	regulation of axon guidance [GO:1902667]	zinc ion binding [GO:0008270]	N/D	Zswim8	CTR	Other or N/D	Metal ion binding
collagen alpha-1(IV) chain	P02463	basement membrane organization [GO:0071711]; blood vessel morphogenesis [GO:0048514]; brain development [GO:0007420]; branching involved in blood vessel morphogenesis [GO:0001569]; cellular response to amino acid stimulus [GO:0071230]; collagen-activated tyrosine kinase receptor signaling pathway [GO:0038063]; epithelial cell differentiation [GO:0030855]; extracellular matrix organization [GO:003…	extracellular matrix structural constituent [GO:0005201]; extracellular matrix structural constituent conferring tensile strength [GO:0030020]; platelet-derived growth factor binding [GO:0048407]	Secreted, extracellular space, extracellular matrix, basement membrane {ECO:0000269|PubMed:24368846}.	Col4a1	CTR	Other or N/D	Extracellular matrix
collagen alpha-1(V) chain	O88207	blood vessel development [GO:0001568]; cell adhesion [GO:0007155]; cell migration [GO:0016477]; collagen biosynthetic process [GO:0032964]; collagen fibril organization [GO:0030199]; extracellular matrix organization [GO:0030198]; eye morphogenesis [GO:0048592]; heart morphogenesis [GO:0003007]; integrin biosynthetic process [GO:0045112]; negative regulation of endodermal cell differentiation [GO…	extracellular matrix structural constituent [GO:0005201]; heparin binding [GO:0008201]; platelet-derived growth factor binding [GO:0048407]; proteoglycan binding [GO:0043394]	Secreted, extracellular space, extracellular matrix {ECO:0000255|PROSITE-ProRule:PRU00793}.	Col5a1	CTR	Other or N/D	Extracellular matrix
collagen alpha-2(XI) chain	Q64739	cartilage development [GO:0051216]; chondrocyte differentiation [GO:0002062]; collagen fibril organization [GO:0030199]; extracellular matrix organization [GO:0030198]; osteoblast differentiation [GO:0001649]; roof of mouth development [GO:0060021]; sensory perception of sound [GO:0007605]; skeletal system development [GO:0001501]; skeletal system morphogenesis [GO:0048705]; soft palate developme…	extracellular matrix structural constituent [GO:0005201]; metal ion binding [GO:0046872]	Secreted, extracellular space, extracellular matrix {ECO:0000255|PROSITE-ProRule:PRU00793}.	Col11a2	CTR	Other or N/D	Extracellular matrix
collagen alpha-6(VI) chain	Q8C6K9	cell adhesion [GO:0007155]	N/D	Secreted, extracellular space, extracellular matrix {ECO:0000269|PubMed:18276594}. Note=Deposed in the extracellular matrix of skeletal muscle.	Col6a6	CTR	Other or N/D	Extracellular matrix
serum albumin	P07724	cellular response to starvation [GO:0009267]; maintenance of mitochondrion location [GO:0051659]; negative regulation of apoptotic process [GO:0043066]; negative regulation of protein oligomerization [GO:0032460]; positive regulation of circadian sleep/wake cycle, non-REM sleep [GO:0046010]	chaperone binding [GO:0051087]; DNA binding [GO:0003677]; drug binding [GO:0008144]; enterobactin binding [GO:1903981]; enzyme binding [GO:0019899]; exogenous protein binding [GO:0140272]; fatty acid binding [GO:0005504]; identical protein binding [GO:0042802]; oxygen binding [GO:0019825]; pyridoxal phosphate binding [GO:0030170]; toxic substance binding [GO:0015643]; zinc ion binding [GO:0008270]	Secreted.	Alb	CTR	Other or N/D	Chaperone/protein folding
voltage-dependent T-type calcium channel subunit alpha-1G	Q5SUG4	action potential [GO:0001508]; artery smooth muscle contraction [GO:0014824]; AV node cell action potential [GO:0086016]; AV node cell to bundle of His cell signaling [GO:0086027]; calcium ion import [GO:0070509]; calcium ion transmembrane transport [GO:0070588]; calcium ion transport into cytosol [GO:0060402]; cardiac muscle cell action potential involved in contraction [GO:0086002]; chemical sy…	low voltage-gated calcium channel activity [GO:0008332]; scaffold protein binding [GO:0097110]; voltage-gated calcium channel activity [GO:0005245]; voltage-gated calcium channel activity involved in AV node cell action potential [GO:0086056]; voltage-gated calcium channel activity involved SA node cell action potential [GO:0086059]; voltage-gated sodium channel activity [GO:0005248]	Membrane {ECO:0000256|RuleBase:RU003808}; Multi-pass membrane protein {ECO:0000256|RuleBase:RU003808}.	Cacna1g	CTR	Other or N/D	Chaperone/protein folding
protocadherin Fat 2	Q5F226	cell-cell adhesion [GO:0098609]; cell-substrate adhesion [GO:0031589]; epithelial cell migration [GO:0010631]; homophilic cell adhesion via plasma membrane adhesion molecules [GO:0007156]	calcium ion binding [GO:0005509]	Cell membrane {ECO:0000305}; Single-pass membrane protein {ECO:0000305}. Cell junction {ECO:0000250|UniProtKB:Q9NYQ8}. Golgi apparatus, trans-Golgi network {ECO:0000250|UniProtKB:O88277}. Note=Localized at adhesion zippers (early state of adherens junctions) of keratinocytes. {ECO:0000250|UniProtKB:Q9NYQ8}.	Fat2	CTR	Other or N/D	Cell adhesion
astrotactin-1	Q61137	cell-cell adhesion [GO:0098609]; cell migration [GO:0016477]; locomotory behavior [GO:0007626]; neuron cell-cell adhesion [GO:0007158]; neuron migration [GO:0001764]	N/D	Cell membrane {ECO:0000269|PubMed:20573900, ECO:0000269|PubMed:8602532}; Multi-pass membrane protein {ECO:0000305}. Perikaryon {ECO:0000269|PubMed:20573900}. Endosome {ECO:0000269|PubMed:20573900}. Cytoplasmic vesicle, clathrin-coated vesicle {ECO:0000305|PubMed:20573900}. Note=Detected close to the anterior pole and at the base of the leading process in migrating neurons. Is internalized from th…	Astn1	CTR	Other or N/D	Cell adhesion
interleukin-1 receptor-associated kinase-like 2	Q8CFA1	cytokine-mediated signaling pathway [GO:0019221]; I-kappaB kinase/NF-kappaB signaling [GO:0007249]; inflammatory response [GO:0006954]; interleukin-1-mediated signaling pathway [GO:0070498]; intracellular signal transduction [GO:0035556]; lipopolysaccharide-mediated signaling pathway [GO:0031663]; MyD88-dependent toll-like receptor signaling pathway [GO:0002755]; negative regulation of DNA-bindin…	ATP binding [GO:0005524]; protein heterodimerization activity [GO:0046982]; protein homodimerization activity [GO:0042803]; protein kinase activity [GO:0004672]; protein serine/threonine kinase activity [GO:0004674]	N/D	Irak2	CTR	Other or N/D	Apoptosis/Inflammation
adenylyl cyclase-associated protein 2	Q9CYT6	actin polymerization or depolymerization [GO:0008154]; cell morphogenesis [GO:0000902]; establishment or maintenance of cell polarity [GO:0007163]	actin binding [GO:0003779]; adenylate cyclase binding [GO:0008179]; identical protein binding [GO:0042802]	Cell membrane {ECO:0000250}; Peripheral membrane protein {ECO:0000250}.	Cap2	T2D	Other or N/D	Structural/contractile
myosin-7B	A2AQP0		actin filament binding [GO:0051015]; ATP binding [GO:0005524]; motor activity [GO:0003774]	Membrane {ECO:0000250}; Peripheral membrane protein {ECO:0000250}.	Myh7b	T2D	Other or N/D	Structural/contractile
sodium/potassium-transporting ATPase subunit alpha-1	Q8K2R2		ATP binding [GO:0005524]; metal ion binding [GO:0046872]; potassium transmembrane transporter activity, phosphorylative mechanism [GO:0008556]	Membrane {ECO:0000256|RuleBase:RU362084}.	Atp1a1	T2D	Other or N/D	Structural/contractile
troponin T	P50752	actin crosslink formation [GO:0051764]; atrial cardiac muscle tissue morphogenesis [GO:0055009]; cardiac muscle contraction [GO:0060048]; heart development [GO:0007507]; muscle contraction [GO:0006936]; muscle filament sliding [GO:0030049]; negative regulation of ATPase activity [GO:0032780]; positive regulation of ATPase activity [GO:0032781]; regulation of heart contraction [GO:0008016]; regula…	actin binding [GO:0003779]; calcium ion binding [GO:0005509]; protein binding, bridging [GO:0030674]; protein-containing complex binding [GO:0044877]; structural constituent of cytoskeleton [GO:0005200]; tropomyosin binding [GO:0005523]; troponin C binding [GO:0030172]; troponin I binding [GO:0031013]	N/D	Tnnt2	T2D	Other or N/D	Structural/contractile
nebulin	E9Q1W3	cardiac muscle thin filament assembly [GO:0071691]; muscle fiber development [GO:0048747]; regulation of actin filament length [GO:0030832]; sarcomere organization [GO:0045214]	actin filament binding [GO:0051015]	N/D	Neb	T2D	Other or N/D	Structural/contractile
myosin regulatory light chain 10	Q62082		calcium ion binding [GO:0005509]	N/D	Myl10	T2D	Other or N/D	Structural/contractile
cilia- and flagella-associated protein 100	Q80VN0	cilium movement [GO:0003341]; inner dynein arm assembly [GO:0036159]; regulation of microtubule motor activity [GO:2000574]	dynein complex binding [GO:0070840]	Cytoplasm, cytoskeleton, cilium axoneme {ECO:0000250|UniProtKB:A8I4E9}.	Cfap100	T2D	Other or N/D	Structural/contractile
rho GTPase-activating protein 9	Q8QZW8	regulation of GTPase activity [GO:0043087]; signal transduction [GO:0007165]	GTPase activator activity [GO:0005096]; phosphatidylinositol-3,4,5-trisphosphate binding [GO:0005547]	N/D	Arhgap9	T2D	Other or N/D	Signal transduction
PHD and RING finger domain-containing protein 1	A6H619	mRNA processing [GO:0006397]; transcription by RNA polymerase II [GO:0006366]	metal ion binding [GO:0046872]; protein domain specific binding [GO:0019904]; RNA polymerase binding [GO:0070063]	N/D	Phrf1	T2D	Other or N/D	Regulation of gene expression
tetratricopeptide repeat protein 14	Q9CSP9		nucleic acid binding [GO:0003676]	N/D	Ttc14	T2D	Other or N/D	Other
CEP295 N-terminal-like protein	Q497N6		N/D	N/D	Cep295nl	T2D	Other or N/D	N/D
protein hinderin	Q6NZK5		N/D	N/D	Kiaa1328	T2D	Other or N/D	N/D
PDZ domain-containing protein 2	E9Q1M1		N/D	N/D	Pdzd2	T2D	Other or N/D	N/D
von Willebrand factor A domain-containing protein 3A	Q3UVV9		N/D	N/D	Vwa3a	T2D	Other or N/D	N/D
WD repeat-containing protein 27	Q8C5V5		N/D	N/D	Wdr27	T2D	Other or N/D	N/D
carnitine O-acetyltransferase	P47934	carnitine metabolic process, CoA-linked [GO:0019254]; fatty acid metabolic process [GO:0006631]	carnitine O-acetyltransferase activity [GO:0004092]	Endoplasmic reticulum {ECO:0000305}. Peroxisome {ECO:0000305}. Mitochondrion inner membrane {ECO:0000305}; Peripheral membrane protein {ECO:0000305}; Matrix side {ECO:0000305}.	Crat	T2D	Other or N/D	FA metabolism
collagen alpha-1(XVIII) chain	P39061	angiogenesis [GO:0001525]; cell adhesion [GO:0007155]; endothelial cell morphogenesis [GO:0001886]; extracellular matrix organization [GO:0030198]; positive regulation of cell migration [GO:0030335]; positive regulation of cell population proliferation [GO:0008284]; positive regulation of endothelial cell apoptotic process [GO:2000353]	extracellular matrix structural constituent [GO:0005201]; identical protein binding [GO:0042802]; metal ion binding [GO:0046872]	Secreted, extracellular space, extracellular matrix {ECO:0000250}. Secreted, extracellular space, extracellular matrix, basement membrane {ECO:0000269|PubMed:9687493}.; [Non-collagenous domain 1]: Secreted, extracellular space, extracellular matrix, basement membrane {ECO:0000305|PubMed:9687493}. Secreted {ECO:0000269|PubMed:10626789}.; [Endostatin]: Secreted {ECO:0000269|PubMed:10626789, ECO:000…	Col18a1	T2D	Other or N/D	Extracellular matrix
collagen alpha-1(I) chain	P11087	blood vessel development [GO:0001568]; bone trabecula formation [GO:0060346]; cartilage development involved in endochondral bone morphogenesis [GO:0060351]; cellular response to amino acid stimulus [GO:0071230]; cellular response to epidermal growth factor stimulus [GO:0071364]; cellular response to fibroblast growth factor stimulus [GO:0044344]; cellular response to fluoride [GO:1902618]; cellu…	extracellular matrix structural constituent [GO:0005201]; identical protein binding [GO:0042802]; metal ion binding [GO:0046872]; platelet-derived growth factor binding [GO:0048407]; protease binding [GO:0002020]	Secreted, extracellular space, extracellular matrix {ECO:0000255|PROSITE-ProRule:PRU00793}.	Col1a1	T2D	Other or N/D	Extracellular matrix
baculoviral IAP repeat-containing protein 6	O88738	apoptotic process [GO:0006915]; cell cycle [GO:0007049]; cell division [GO:0051301]; labyrinthine layer development [GO:0060711]; negative regulation of apoptotic process [GO:0043066]; negative regulation of extrinsic apoptotic signaling pathway [GO:2001237]; placenta development [GO:0001890]; positive regulation of cell population proliferation [GO:0008284]; protein ubiquitination [GO:0016567]; …	cysteine-type endopeptidase inhibitor activity [GO:0004869]; ubiquitin conjugating enzyme activity [GO:0061631]; ubiquitin-protein transferase activity [GO:0004842]	Golgi apparatus, trans-Golgi network membrane {ECO:0000250|UniProtKB:Q9NR09}. Endosome {ECO:0000250|UniProtKB:Q9NR09}. Cytoplasm, cytoskeleton, spindle pole {ECO:0000250|UniProtKB:Q9NR09}. Cytoplasm, cytoskeleton, microtubule organizing center, centrosome {ECO:0000250|UniProtKB:Q9NR09}. Midbody, Midbody ring {ECO:0000250|UniProtKB:Q9NR09}. Note=Exhibits cell cycle-dependent localization. Concentr…	Birc6	T2D	Other or N/D	Apoptosis/Inflammation
lysozyme C-2	P08905	cytolysis [GO:0019835]; defense response to bacterium [GO:0042742]; defense response to Gram-negative bacterium [GO:0050829]; defense response to Gram-positive bacterium [GO:0050830]; metabolic process [GO:0008152]	hydrolase activity, acting on glycosyl bonds [GO:0016798]; identical protein binding [GO:0042802]; lysozyme activity [GO:0003796]	Secreted.	Lyz2	T2D	Other or N/D	Apoptosis/Inflammation
myosin-6	Q64331	cellular response to electrical stimulus [GO:0071257]; chemical synaptic transmission [GO:0007268]; dendrite development [GO:0016358]; DNA damage response, signal transduction by p53 class mediator [GO:0030330]; endocytosis [GO:0006897]; glutamate secretion [GO:0014047]; inner ear auditory receptor cell differentiation [GO:0042491]; inner ear development [GO:0048839]; inner ear morphogenesis [GO:…	actin filament binding [GO:0051015]; ATP binding [GO:0005524]; calmodulin binding [GO:0005516]; identical protein binding [GO:0042802]; motor activity [GO:0003774]	Golgi apparatus, trans-Golgi network membrane {ECO:0000250|UniProtKB:Q9UM54}; Peripheral membrane protein {ECO:0000250|UniProtKB:Q9UM54}. Golgi apparatus {ECO:0000250|UniProtKB:Q9UM54}. Nucleus {ECO:0000250|UniProtKB:Q9UM54}. Cytoplasm, perinuclear region {ECO:0000250|UniProtKB:Q9UM54}. Membrane, clathrin-coated pit {ECO:0000250|UniProtKB:Q9UM54}. Cytoplasmic vesicle, clathrin-coated vesicle {ECO…	Myo6	CTR/T2D	Other or N/D	Structural/contractile
sarcoplasmic/endoplasmic reticulum calcium ATPase 2	O55143	calcium ion import into sarcoplasmic reticulum [GO:1990036]; calcium ion transmembrane transport [GO:0070588]; calcium ion transport [GO:0006816]; calcium ion transport from cytosol to endoplasmic reticulum [GO:1903515]; cardiac muscle hypertrophy in response to stress [GO:0014898]; cellular calcium ion homeostasis [GO:0006874]; cellular response to heat [GO:0034605]; cellular response to oxidati…	ATP binding [GO:0005524]; calcium ion binding [GO:0005509]; calcium transmembrane transporter activity, phosphorylative mechanism [GO:0005388]; calcium-transporting ATPase activity involved in regulation of cardiac muscle cell membrane potential [GO:0086039]; enzyme binding [GO:0019899]; lutropin-choriogonadotropic hormone receptor binding [GO:0031775]; protein C-terminus binding [GO:0008022]; pr…	Endoplasmic reticulum membrane {ECO:0000269|PubMed:23395171}; Multi-pass membrane protein {ECO:0000255}. Sarcoplasmic reticulum membrane {ECO:0000269|PubMed:22355118}; Multi-pass membrane protein {ECO:0000255}.	Atp2a2	CTR/T2D	Other or N/D	Structural/contractile
sarcoplasmic/endoplasmic reticulum calcium ATPase 1	Q8R429	apoptotic mitochondrial changes [GO:0008637]; calcium ion import [GO:0070509]; calcium ion import into sarcoplasmic reticulum [GO:1990036]; calcium ion transmembrane transport [GO:0070588]; calcium ion transport [GO:0006816]; cellular calcium ion homeostasis [GO:0006874]; intrinsic apoptotic signaling pathway in response to endoplasmic reticulum stress [GO:0070059]; maintenance of mitochondrion l…	ATPase activity [GO:0016887]; ATP binding [GO:0005524]; calcium ion binding [GO:0005509]; calcium transmembrane transporter activity, phosphorylative mechanism [GO:0005388]; nucleotide-sugar transmembrane transporter activity [GO:0005338]; protein homodimerization activity [GO:0042803]; proton-exporting ATPase activity, phosphorylative mechanism [GO:0008553]	Endoplasmic reticulum membrane {ECO:0000250|UniProtKB:P04191}; Multi-pass membrane protein {ECO:0000250|UniProtKB:P04191}. Sarcoplasmic reticulum membrane {ECO:0000269|PubMed:26816378}; Multi-pass membrane protein {ECO:0000250|UniProtKB:P04191}.	Atp2a1	CTR/T2D	Other or N/D	Structural/contractile
keratin type I	P02535	cellular response to calcium ion [GO:0071277]; epidermis development [GO:0008544]; epithelial cell differentiation [GO:0030855]; intermediate filament organization [GO:0045109]; keratinocyte development [GO:0003334]; positive regulation of epidermis development [GO:0045684]; protein heterotetramerization [GO:0051290]	cytoskeletal protein binding [GO:0008092]; protein heterodimerization activity [GO:0046982]; structural molecule activity [GO:0005198]	Cell surface {ECO:0000269|PubMed:19627498}.	Krt10	CTR/T2D	Other or N/D	Structural/contractile
myosin-binding protein C	O70468	cardiac muscle contraction [GO:0060048]; cell adhesion [GO:0007155]; heart morphogenesis [GO:0003007]; muscle contraction [GO:0006936]; myosin filament assembly [GO:0031034]; regulation of heart contraction [GO:0008016]; regulation of heart rate [GO:0002027]; sarcomere organization [GO:0045214]; ventricular cardiac muscle tissue morphogenesis [GO:0055010]	actin binding [GO:0003779]; identical protein binding [GO:0042802]; metal ion binding [GO:0046872]; myosin binding [GO:0017022]; myosin heavy chain binding [GO:0032036]; structural constituent of cytoskeleton [GO:0005200]; structural constituent of muscle [GO:0008307]	N/D	Mybpc3	CTR/T2D	Other or N/D	Structural/contractile
myosin-2	Q1WNQ9	actin-mediated cell contraction [GO:0070252]; muscle contraction [GO:0006936]; plasma membrane repair [GO:0001778]; response to activity [GO:0014823]	actin filament binding [GO:0051015]; ATP binding [GO:0005524]; motor activity [GO:0003774]	N/D	Myh2	CTR/T2D	Other or N/D	Structural/contractile
myosin-13	B1AR69	cellular response to starvation [GO:0009267]	actin filament binding [GO:0051015]; ATP binding [GO:0005524]; motor activity [GO:0003774]	N/D	Myh13	CTR/T2D	Other or N/D	Structural/contractile
myosin light chain 3	P09542	cardiac muscle contraction [GO:0060048]; regulation of striated muscle contraction [GO:0006942]; regulation of the force of heart contraction [GO:0002026]; skeletal muscle tissue development [GO:0007519]; ventricular cardiac muscle tissue morphogenesis [GO:0055010]	actin monomer binding [GO:0003785]; calcium ion binding [GO:0005509]; motor activity [GO:0003774]	N/D	Myl3	CTR/T2D	Other or N/D	Structural/contractile
sarcoplasmic reticulum histidine-rich calcium-binding	Q9WVE4	calcium ion homeostasis [GO:0055074]; negative regulation of calcium ion import into sarcoplasmic reticulum [GO:1902081]; negative regulation of cytosolic calcium ion concentration [GO:0051481]; regulation of heart contraction [GO:0008016]	calcium ion binding [GO:0005509]	N/D	Hrc	CTR/T2D	Other or N/D	Structural/contractile
troponin C	E9Q8P0		calcium ion binding [GO:0005509]	N/D	Tnnc1	CTR/T2D	Other or N/D	Structural/contractile
zinc finger CCCH domain-containing protein 4	Q6ZPZ3	negative regulation of transcription, DNA-templated [GO:0045892]	DNA-binding transcription factor activity [GO:0003700]; metal ion binding [GO:0046872]	N/D	Zc3h4	CTR/T2D	Other or N/D	Regulation of gene expression
keratin type II cytoskeletal 1b	Q6IFZ6		N/D	N/D	Krt77	CTR/T2D	Other or N/D	N/D
keratin Kb40	Q6IFT3		N/D	N/D	Krt78	CTR/T2D	Other or N/D	N/D
myosin-8	P13542		N/D	N/D	Myh8	CTR/T2D	Other or N/D	N/D
ATP synthase subunit alpha	D3Z6F5	ATP synthesis coupled proton transport [GO:0015986]	ATP binding [GO:0005524]; proton-transporting ATP synthase activity, rotational mechanism [GO:0046933]	N/D	Atp5a1	CTR/T2D	Other or N/D	Mitochondrial respiration
keratin type II	Q922U2		scaffold protein binding [GO:0097110]	N/D	Krt5	CTR/T2D	Other or N/D	Chaperone/protein folding
long-chain-fatty-acid--CoA ligase 1	P41216	adiponectin-activated signaling pathway [GO:0033211]; fatty acid metabolic process [GO:0006631]; fatty acid transport [GO:0015908]; lipid biosynthetic process [GO:0008610]; long-chain fatty acid import into cell [GO:0044539]; long-chain fatty acid metabolic process [GO:0001676]; long-chain fatty-acyl-CoA biosynthetic process [GO:0035338]; positive regulation of cold-induced thermogenesis [GO:0120…	acyl-CoA ligase activity [GO:0003996]; arachidonate-CoA ligase activity [GO:0047676]; ATP binding [GO:0005524]; decanoate-CoA ligase activity [GO:0102391]; long-chain fatty acid-CoA ligase activity [GO:0004467]; phytanate-CoA ligase activity [GO:0050197]	Mitochondrion outer membrane {ECO:0000250}; Single-pass type III membrane protein {ECO:0000250}. Peroxisome membrane {ECO:0000250}; Single-pass type III membrane protein {ECO:0000250}. Microsome membrane {ECO:0000250}; Single-pass type III membrane protein {ECO:0000250}. Endoplasmic reticulum membrane {ECO:0000250|UniProtKB:P33121}; Single-pass type III membrane protein {ECO:0000250}.	Acsl1	T2D	Mitochondrion	FA metabolism
delta(3 5)-Delta(2 4)-dienoyl-CoA isomerase	O35459	fatty acid beta-oxidation [GO:0006635]	delta3,5-delta2,4-dienoyl-CoA isomerase activity [GO:0051750]	Mitochondrion {ECO:0000250}. Peroxisome {ECO:0000250}.	Ech1	T2D	Mitochondrion	FA metabolism
E3 ubiquitin-protein ligase UBR4	A2AN08	ubiquitin-dependent protein catabolic process [GO:0006511]	calmodulin binding [GO:0005516]; ubiquitin-protein transferase activity [GO:0004842]; zinc ion binding [GO:0008270]	Membrane {ECO:0000305}; Multi-pass membrane protein {ECO:0000305}. Cytoplasm {ECO:0000250}. Cytoplasm, cytoskeleton {ECO:0000250}. Nucleus {ECO:0000250}. Note=Concentrates at the leading edge of membrane structures involved in actin motility. {ECO:0000250}.	Ubr4	CTR	Other	Other
